# Supplementary material for: Comparison of Methods for Estimating Dietary Food and Nutrient Intakes and Intake Densities from Household Consumption and Expenditure Data in Mongolia
Source: MDPI journal article supplement (doi:10.3390/nu10060703), 2018-05-31
Supplement: s1 [file s1]

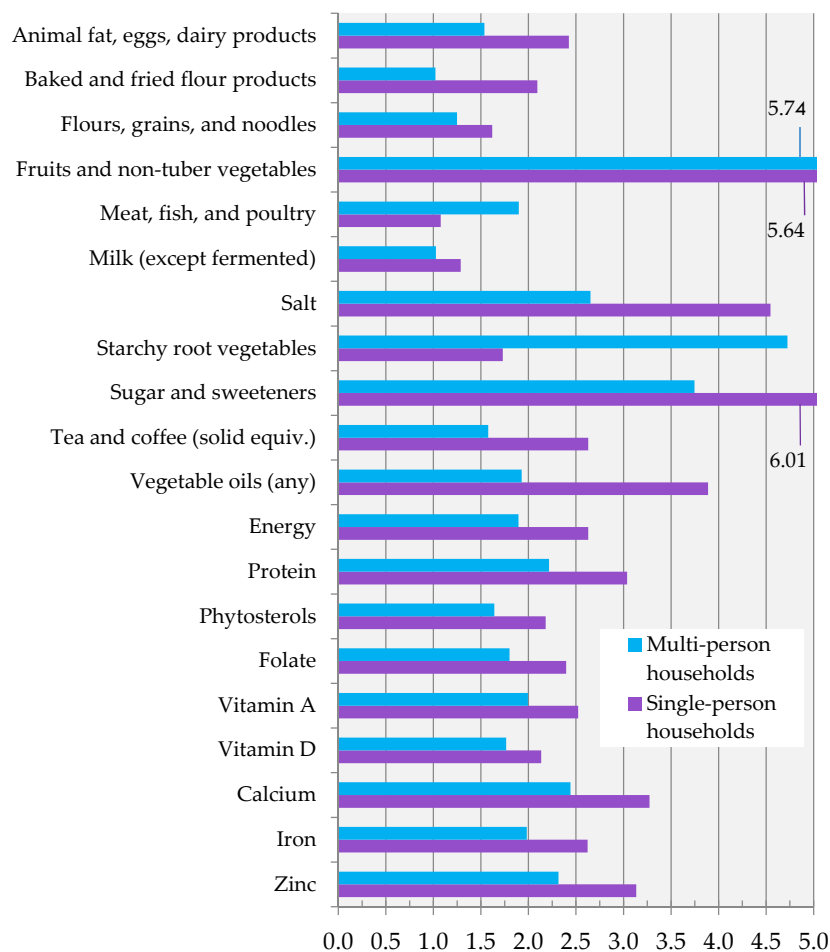

Mean ratio of per capita household consumption to per capita dietary intake

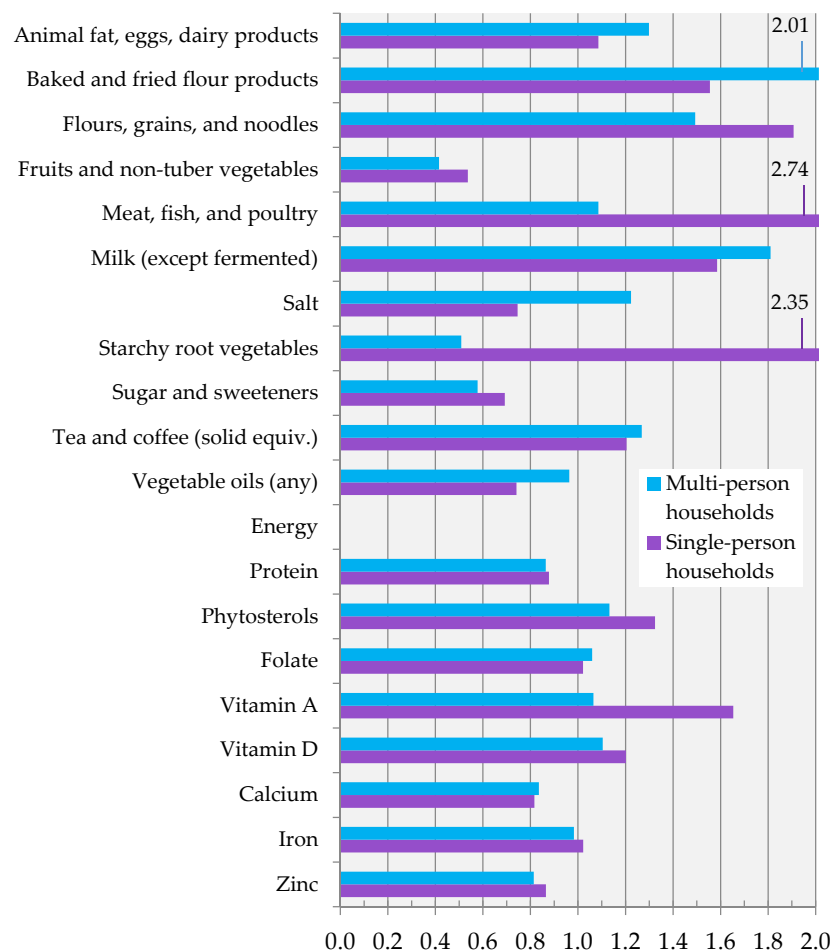

Mean ratio of per capita household consumption density (per 100 kcal) to per capita dietary intake density (per 100 kcal)

**Figure 2.** Mean ratio of per-capita household consumption to per-capita dietary intake (left), and per-capita household consumption density (per 100 kcal) to per-capita dietary intake density (per 100 kcal) (right) for food groups and selected nutrients among 109 FCS-HH households fully-enumerated by the nested FCS-24 (Aim 1). Values for 6 data points exceed the graphs' x-axis limits and are indicated using annotations. Abbreviations: FCS-HH (2013 Food Consumption Survey), FCS-24 (nested 24-hour recall).
