# Supplementary material for: Comparison of Methods for Estimating Dietary Food and Nutrient Intakes and Intake Densities from Household Consumption and Expenditure Data in Mongolia
Source: MDPI journal article supplement (doi:10.3390/nu10060703), 2018-05-31
Supplement: s1 [file s1]

**Initial sources of data (prior to applying exclusion criteria)**

2013 Food Consumption Survey (FCS-HH): household food consumption recall collected from 1017 households comprising 4087 individuals

Multiple pass 24-hour recall (FCS-24): dietary assessment collected from a subset of 1369 individuals across 768 FCS-HH households

A subset of FCS-HH households in which all household members participated in the FCS-24 (n = 109 households and 196 individuals).

Summer 2012 and 2014 waves of the Household Socio-Economic Survey (HSES-HH): household food consumption diary collected from 9849 households comprising 35920 individuals

**Source of data for Aim 1: Direct comparison between per-capita dietary measurements and per capita household consumption measurements**

A subset of FCS-HH households in which all household members participated in the FCS-24 (n = 109 households and 196 individuals).

**Sources of data for Aims 2 and 3: Statistical and AME disaggregation of household food and nutrient consumption**

2013 Food Consumption Survey (FCS-HH): household food consumption recall collected from 1012 households comprising 4070 individuals

Multiple pass 24-hour recall (FCS-24): dietary assessment collected from a subset of 1369 individuals across 768 FCS-HH households

Summer 2012 and 2014 waves of the Household Socio-Economic Survey (HSES-HH): household food consumption diary collected from 9424 households comprising 34946 individuals

**Source of data for Aim 4: Direct prediction of nutrient intake by individuals**

Multiple pass 24-hour recall (FCS-24): dietary assessment collected from a subset of 1369 individuals across 768 FCS-HH households

**Figure 1.** Sources of data. See Methods for description of exclusion criteria and information regarding ancillary diet records and national census data used in preparing and analyzing the FCS-HH, nested FCS-24, and HSES-HH.
