# Supplementary material for: Comparison of Methods for Estimating Dietary Food and Nutrient Intakes and Intake Densities from Household Consumption and Expenditure Data in Mongolia
Source: MDPI journal article supplement (doi:10.3390/nu10060703), 2018-05-31
Supplement: s1 [file s1]

# **Supplementary Materials: Comparison of methods for estimating dietary food and nutrient intakes and intake densities from household consumption and expenditure data in Mongolia**

Sabri Bromage, Bernard Rosner, Janet W. Rich-Edwards, Davaasambuu Ganmaa, Soninkhishig Tsolmon, Zuunnast Tserendejid, Tseye-Oidov Odbayar, Margaret Traeger, and Wafaie W. Fawzi

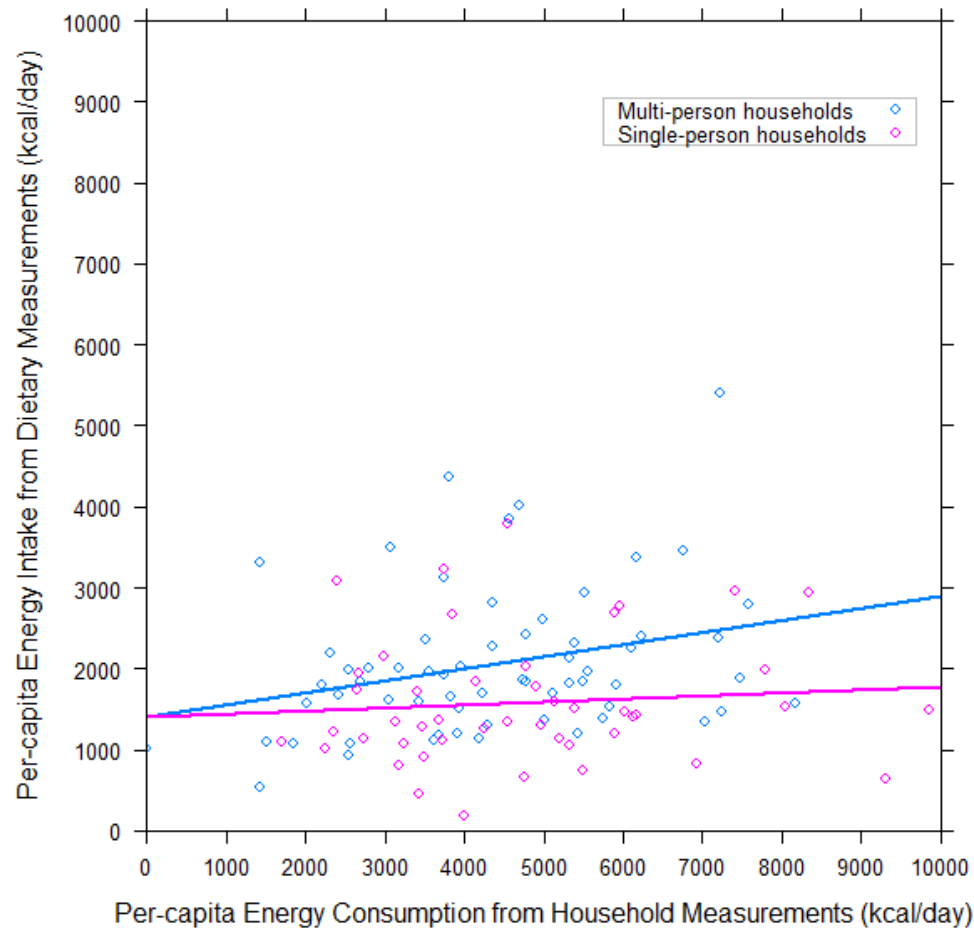

**Figure S1.** Relationship between per-capita household energy consumption and per-capita dietary intake (kcal/day) among 109 FCS-HH households fully-enumerated by the nested FCS-24 (Aim 1). Pearson correlation coefficients for multi- and single-person households: 0.29 and 0.09, respectively (Spearman rank correlation coefficients: 0.29 and 0.14, respectively).

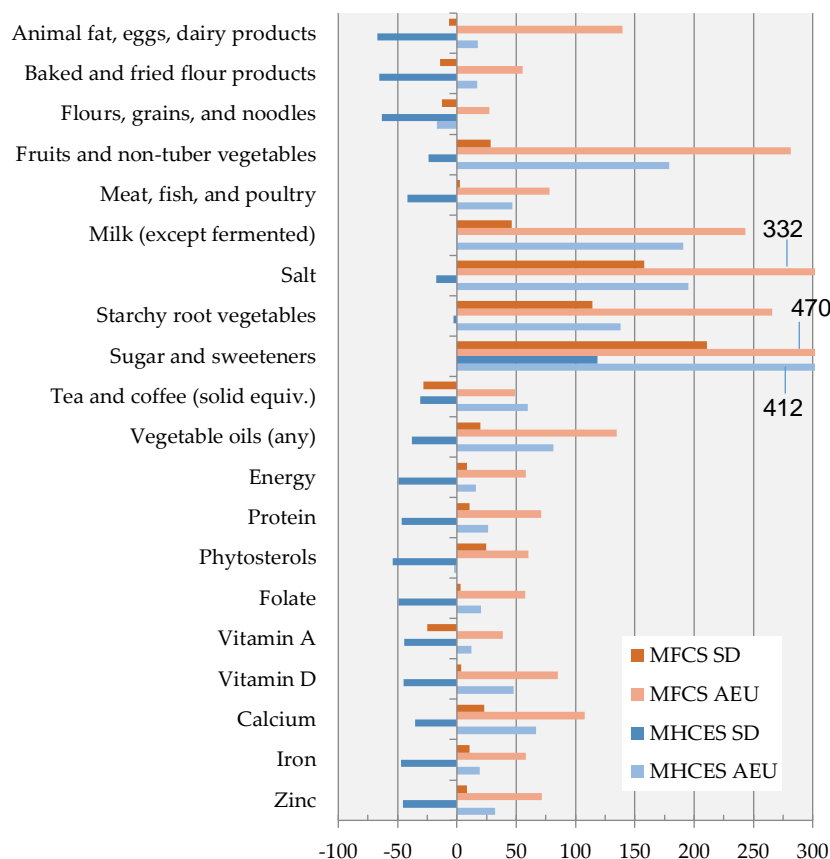

Mean Bias in Dissaggregated Household Consumption Estimate /  
Mean Observed Intake from FCS-24 \* 100

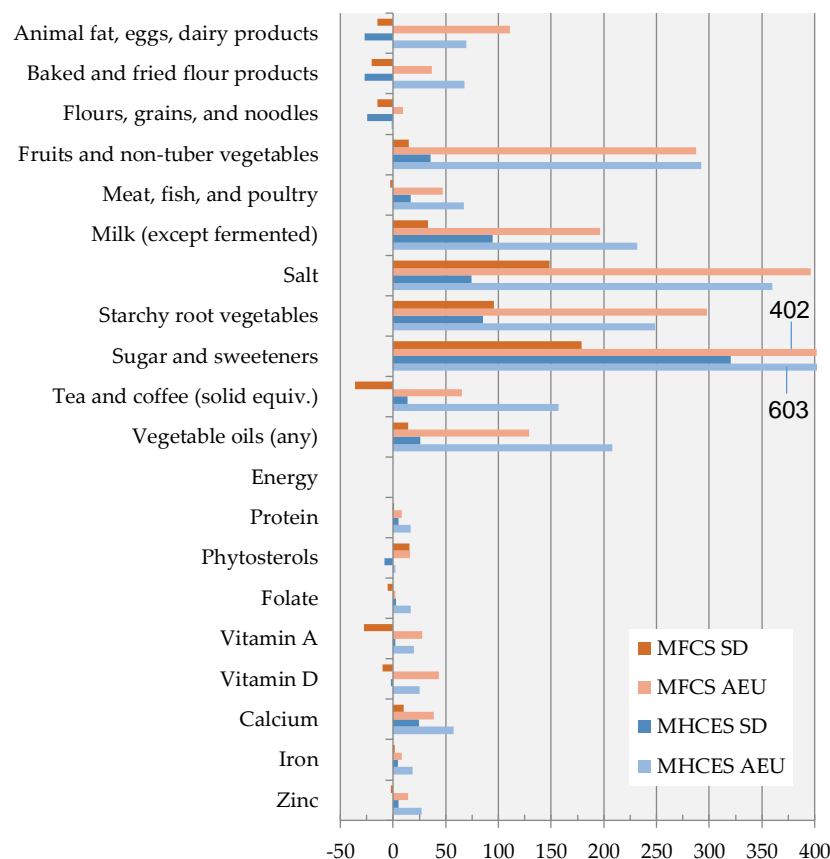

Mean Bias in Dissaggregated Household Consumption Estimate per  
100 kcal / Mean Observed Intake per 100 kcal from FCS-24 \* 100

**Figure S2.** Mean bias of disaggregated household consumption estimates of individuals' food group and selected nutrient intake and intake density (per 100 kcal) across 14 age-sex groups (Aims 2 and 3). Values for 5 data points exceed the graphs' x-axis limits and are indicated using annotations. Abbreviations: FCS-HH (2013 Food Consumption Survey), FCS-24 (nested 24-hour recall), HSES-HH (2012/2014 Household Socio-Economic Survey), SD1 (unadjusted statistical disaggregation method), AME (adult male equivalent method). Statistics are survey weighted.

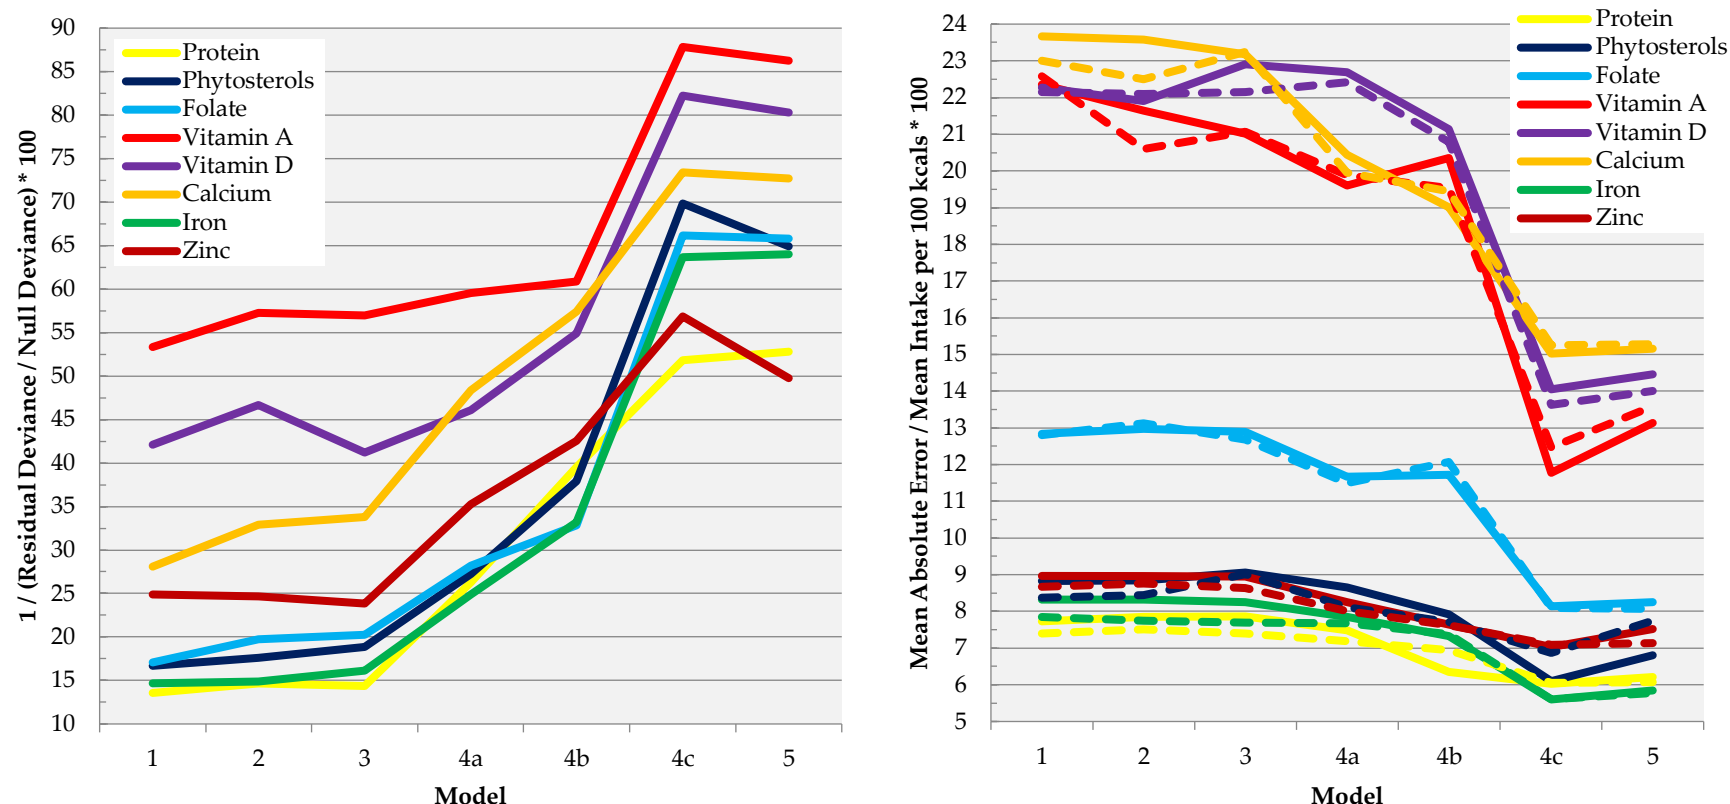

**Figure S3.** In-sample fit statistics for increasingly complex predictive models of individuals' dietary intakes densities of selected nutrients in the FCS-24 (Aim 4). Panel A: percentage of deviance explained; Panel B: mean absolute bias (proportional to mean observed dietary intake). In the right panel, dashed lines indicate mean absolute error estimated by separately predicting nutrient intake and energy intake, dividing predicted nutrient intake by predicted energy intake, and comparing the results to observed dietary intake measurements in the FCS-24, while solid lines indicate mean absolute error of predicting nutrient intake densities directly. See Table 4 for detailed descriptions of models 1-5. Brief description of variable categories considered for selection in each model: (1) Household and individual demographic, socioeconomic, and lifestyle characteristics, (2) Model 1 variables + quantitative total household consumption of food groups and nutrients, (3) Model 2 variables + individuals' self-evaluation of nutrition knowledge and its application to their lives, (4a) Model 3 variables + cursory qualitative 24-hour recall and assessment of eating behaviors, (4b) Model 3 variables + cursory semiquantitative 24-hour recall and assessment of eating behaviors, (4c) Model 3 variables + detailed semiquantitative 24-hour recall, (5) Model 4 variables + measured anthropometry. Abbreviation: FCS-24 (nested 24-hour recall of the 2013 Food Consumption Survey)

**Table S1.** Schofield equations for predicting individuals' basal metabolic rate

| Sex    | Age       | Equation                         |
|--------|-----------|----------------------------------|
| Male   | 0-3 yrs   | $0.0007 * W + 6.349 * H - 2.584$ |
|        | 3-10 yrs  | $0.082 * W + 0.545 * H + 1.736$  |
|        | 10-18 yrs | $0.068 * W + 0.574 * H + 2.157$  |
|        | 18-30 yrs | $0.063 * W - 0.042 * H + 2.953$  |
|        | 30-60 yrs | $0.048 * W - 0.011 * H + 3.670$  |
|        | 60+ yrs   | $0.038 * W + 4.068 * H - 3.491$  |
| Female | 0-3 yrs   | $0.068 * W + 4.281 * H - 1.730$  |
|        | 3-10 yrs  | $0.071 * W + 0.677 * H + 1.553$  |
|        | 10-18 yrs | $0.035 * W + 1.948 * H + 0.837$  |
|        | 18-30 yrs | $0.057 * W + 1.184 * H + 0.411$  |
|        | 30-60 yrs | $0.034 * W + 0.006 * H + 3.50$   |
|        | 60+ yrs   | $0.033 * W + 1.917 * H - 0.074$  |

Table is reproduced from Schofield 1985. Total energy expenditure is estimated by multiplying basal metabolic rate by the mean of a range of coefficients suggested for different categories of physical activity level: sedentary or light activity (1.40-1.69), active or moderately active (1.70-1.99), vigorous or vigorously active (2.00-2.40) (FAO 2005).

**Table S2.** Ratios of within- to between-person components of variance in dietary nutrient intakes within subgroups of men and women in urban and rural Mongolia

|                |                  | Area: | Rural  |      | Urban  |      |
|----------------|------------------|-------|--------|------|--------|------|
|                |                  | Sex:  | Female | Male | Female | Male |
| Macronutrients | Energy           |       | 2.1    | 2.5  | 1.2    | 2.9  |
|                | Carbohydrates    |       | 2.7    | 1.7  | 1.0    | 3.1  |
|                | Protein          |       | 1.8    | 3.2  | 2.1    | 3.5  |
|                | Total fat        |       | 1.9    | 2.1  | 1.5    | 2.9  |
|                | Alcohol          |       | 3.3    | 1.5  | 7.9    | 3.5  |
|                | Water            |       | 1.2    | 0.9  | 1.0    | 1.2  |
|                | Fiber            |       | 2.9    | 2.5  | 1.5    | 3.6  |
|                | Phytosterols     |       | 3.8    | 3.3  | 1.7    | 4.4  |
| Vitamins       | Thiamin          |       | 2.3    | 1.6  | 1.5    | 2.3  |
|                | Riboflavin       |       | 1.6    | 1.8  | 1.9    | 3.2  |
|                | Niacin           |       | 3.6    | 4.0  | 2.7    | 2.5  |
|                | Pantothenic acid |       | 1.5    | 2.4  | 1.8    | 4.4  |
|                | Vitamin B6       |       | 1.6    | 1.3  | 2.7    | 2.9  |
|                | Folate           |       | 1.7    | 1.2  | 1.6    | 2.3  |
|                | Vitamin B12      |       | 4.9    | 3.5  | 7.0    | 4.1  |
|                | Vitamin C        |       | 4.1    | 20.9 | 8.5    | 5.3  |
|                | Vitamin A        |       | 2.2    | 2.8  | 4.2    | 3.8  |
|                | Vitamin D        |       | 1.8    | 1.7  | 2.9    | 6.5  |
|                | Vitamin E        |       | 2.9    | 1.8  | 1.8    | 9.0  |
| Minerals       | Calcium          |       | 1.0    | 0.9  | 1.6    | 1.8  |
|                | Copper           |       | 2.1    | 2.8  | 2.6    | 3.7  |
|                | Iron             |       | 2.3    | 1.7  | 1.8    | 3.0  |
|                | Magnesium        |       | 1.5    | 2.1  | 1.7    | 3.2  |
|                | Manganese        |       | 1.6    | 2.3  | 1.3    | 3.7  |
|                | Phosphorus       |       | 2.0    | 1.9  | 1.5    | 2.9  |
|                | Potassium        |       | 1.6    | 2.5  | 2.3    | 3.9  |
|                | Zinc             |       | 2.5    | 6.0  | 3.1    | 3.3  |

Components of variance are derived from analysis of 3-day summer and winter diet records collected from 320 Mongolian adults living in urban and rural Mongolia, and are survey-weighted.

**Table S3.** Percentage of individuals or households observed to consume any of each food group or nutrient during each survey's reference period

|                |                                      | Survey:<br>n:               | FCS-24<br>1368 individuals | FCS-HH<br>1017 households | HSES-HH<br>9849 households |
|----------------|--------------------------------------|-----------------------------|----------------------------|---------------------------|----------------------------|
|                |                                      | Length of Reference Period: | 1 day                      | 7 to 30 days              | 7 to 10 days               |
| Food Groups    | Animal fat, eggs, and dairy products |                             | 53.5                       | 95.6                      | 87.8                       |
|                | Baked and fried flour products       |                             | 83.3                       | 94.6                      | 85.1                       |
|                | Flours, grains, and noodles          |                             | 94.6                       | 100.0                     | 99.8                       |
|                | Fruits and non-tuber vegetables      |                             | 62.6                       | 95.6                      | 90.0                       |
|                | Meat, fish, and poultry              |                             | 97.1                       | 99.5                      | 99.9                       |
|                | Milk (except fermented)              |                             | 71.6                       | 95.4                      | 94.1                       |
|                | Salt                                 |                             | 82.3                       | 98.0                      | 98.6                       |
|                | Starchy root vegetables              |                             | 53.8                       | 93.2                      | 82.5                       |
|                | Sugar and sweeteners                 |                             | 20.1                       | 98.6                      | 98.4                       |
|                | Tea or coffee (solid equivalent)     |                             | 49.3                       | 92.5                      | 96.7                       |
|                | Vegetable oils (any)                 |                             | 41.4                       | 95.6                      | 82.5                       |
|                | Energy                               |                             | 100.0                      | 100.0                     | 100.0                      |
| Macronutrients | Carbohydrates                        |                             | 100.0                      | 100.0                     | 100.0                      |
|                | Protein                              |                             | 100.0                      | 100.0                     | 100.0                      |
|                | Total fat                            |                             | 100.0                      | 100.0                     | 100.0                      |
|                | Alcohol                              |                             | 3.5                        | 20.0                      | 11.3                       |
|                | Water                                |                             | 100.0                      | 100.0                     | 100.0                      |
|                | Fiber                                |                             | 99.9                       | 100.0                     | 100.0                      |
|                | Phytosterols                         |                             | 99.8                       | 100.0                     | 100.0                      |
|                |                                      |                             |                            |                           |                            |
| Vitamins       | Thiamin                              |                             | 100.0                      | 100.0                     | 100.0                      |
|                | Riboflavin                           |                             | 100.0                      | 100.0                     | 100.0                      |
|                | Niacin                               |                             | 100.0                      | 100.0                     | 100.0                      |
|                | Pantothenic acid                     |                             | 100.0                      | 100.0                     | 100.0                      |
|                | Vitamin B6                           |                             | 100.0                      | 100.0                     | 100.0                      |
|                | Folate                               |                             | 100.0                      | 100.0                     | 100.0                      |
|                | Vitamin B12                          |                             | 99.9                       | 99.9                      | 100.0                      |
|                | Vitamin C                            |                             | 96.8                       | 99.9                      | 99.8                       |
|                | Vitamin A                            |                             | 96.9                       | 99.7                      | 99.4                       |
|                | Vitamin D                            |                             | 93.8                       | 99.3                      | 99.1                       |
|                | Vitamin E                            |                             | 100.0                      | 100.0                     | 100.0                      |
| Minerals       | Calcium                              |                             | 100.0                      | 100.0                     | 100.0                      |
|                | Copper                               |                             | 100.0                      | 100.0                     | 100.0                      |
|                | Iron                                 |                             | 100.0                      | 100.0                     | 100.0                      |
|                | Magnesium                            |                             | 100.0                      | 100.0                     | 100.0                      |
|                | Manganese                            |                             | 100.0                      | 100.0                     | 100.0                      |
|                | Phosphorus                           |                             | 100.0                      | 100.0                     | 100.0                      |
|                | Potassium                            |                             | 100.0                      | 100.0                     | 100.0                      |
|                | Zinc                                 |                             | 100.0                      | 100.0                     | 100.0                      |
|                |                                      |                             |                            |                           |                            |

Statistics are derived after restricting HSES-HH data to those collected in May, June, July, or August, and prior to excluding households with no permanent members or individuals with ratios of total energy intake to expenditure lying 3 standard deviations beyond the median. Shading indicates values less than 100%. Abbreviations: FCS-HH (2013 Food Consumption Survey); FCS-24 (nested 24-hour recall), HSES-HH (2012/2014 Household Socio-Economic Survey).

**Table S4.** Correlations between ' total daily household consumption in the FCS-HH (upper) and between individuals' daily dietary intakes in the FCS-24 (lower)

| Animal fat, eggs, dairy products | Baked and fried flour products | Flours, grains, and noodles | Fruits and non-tuber vegetables | Meat, fish, and poultry | Milk (except fermented) | Salt  | Starchy root vegetables | Sugar and sweeteners | Tea and coffee (solid equiv.) | Vegetable oils (any) | Energy | Protein | Folate | Phytosterols | Vitamin A | Vitamin D | Calcium | Iron  | Zinc |                                  |
|----------------------------------|--------------------------------|-----------------------------|---------------------------------|-------------------------|-------------------------|-------|-------------------------|----------------------|-------------------------------|----------------------|--------|---------|--------|--------------|-----------|-----------|---------|-------|------|----------------------------------|
| 1.00                             | 0.21                           | 0.31                        | 0.01                            | 0.30                    | 0.51                    | 0.20  | -0.00                   | 0.35                 | 0.12                          | 0.10                 | 0.58   | 0.60    | 0.46   | 0.26         | 0.51      | 0.51      | 0.79    | 0.35  | 0.56 | Animal fat, eggs, dairy products |
|                                  | 1.00                           | 0.28                        | 0.25                            | 0.31                    | 0.17                    | 0.15  | 0.15                    | 0.30                 | 0.20                          | 0.14                 | 0.64   | 0.49    | 0.80   | 0.50         | 0.31      | 0.35      | 0.37    | 0.78  | 0.44 | Baked and fried flour products   |
|                                  |                                | 1.00                        | 0.09                            | 0.31                    | 0.22                    | 0.30  | 0.19                    | 0.44                 | 0.24                          | 0.27                 | 0.73   | 0.61    | 0.60   | 0.80         | 0.34      | 0.26      | 0.33    | 0.61  | 0.53 | Flours, grains, and noodles      |
|                                  |                                |                             | 1.00                            | 0.32                    | 0.01                    | -0.05 | 0.26                    | 0.01                 | 0.07                          | 0.23                 | 0.25   | 0.26    | 0.31   | 0.29         | 0.35      | 0.34      | 0.11    | 0.34  | 0.23 | Fruits and non-tuber vegetables  |
|                                  |                                |                             |                                 | 1.00                    | 0.23                    | 0.16  | 0.17                    | 0.30                 | 0.15                          | 0.20                 | 0.65   | 0.81    | 0.54   | 0.41         | 0.51      | 0.50      | 0.37    | 0.72  | 0.89 | Meat, fish, and poultry          |
|                                  |                                |                             |                                 |                         | 1.00                    | 0.15  | 0.02                    | 0.29                 | 0.17                          | 0.12                 | 0.51   | 0.54    | 0.34   | 0.20         | 0.43      | 0.58      | 0.89    | 0.31  | 0.49 | Milk (except fermented)          |
|                                  |                                |                             |                                 |                         |                         | 1.00  | 0.18                    | 0.32                 | 0.20                          | 0.25                 | 0.34   | 0.27    | 0.28   | 0.26         | 0.22      | 0.19      | 0.21    | 0.27  | 0.25 | Salt                             |
|                                  |                                |                             |                                 |                         |                         |       | 1.00                    | 0.09                 | 0.05                          | 0.33                 | 0.25   | 0.20    | 0.22   | 0.34         | 0.21      | 0.12      | 0.08    | 0.27  | 0.17 | Starchy root vegetables          |
|                                  |                                |                             |                                 |                         |                         |       |                         | 1.00                 | 0.42                          | 0.17                 | 0.56   | 0.48    | 0.49   | 0.40         | 0.34      | 0.29      | 0.38    | 0.45  | 0.45 | Sugar and sweeteners             |
|                                  |                                |                             |                                 |                         |                         |       |                         |                      | 1.00                          | 0.07                 | 0.31   | 0.26    | 0.36   | 0.26         | 0.22      | 0.17      | 0.18    | 0.27  | 0.24 | Tea and coffee (solid equiv.)    |
|                                  |                                |                             |                                 |                         |                         |       |                         |                      |                               | 1.00                 | 0.33   | 0.24    | 0.23   | 0.28         | 0.22      | 0.21      | 0.18    | 0.29  | 0.22 | Vegetable oils (any)             |
|                                  |                                |                             |                                 |                         |                         |       |                         |                      |                               |                      | 1.00   | 0.93    | 0.89   | 0.75         | 0.63      | 0.65      | 0.69    | 0.90  | 0.88 | Energy                           |
|                                  |                                |                             |                                 |                         |                         |       |                         |                      |                               |                      |        | 1.00    | 0.78   | 0.64         | 0.65      | 0.68      | 0.72    | 0.85  | 0.96 | Protein                          |
|                                  |                                |                             |                                 |                         |                         |       |                         |                      |                               |                      |        |         | 1.00   | 0.71         | 0.52      | 0.51      | 0.54    | 0.89  | 0.73 | Folate                           |
|                                  |                                |                             |                                 |                         |                         |       |                         |                      |                               |                      |        |         |        | 1.00         | 0.41      | 0.39      | 0.34    | 0.72  | 0.57 | Phytosterols                     |
|                                  |                                |                             |                                 |                         |                         |       |                         |                      |                               |                      |        |         |        |              | 1.00      | 0.58      | 0.56    | 0.54  | 0.59 | Vitamin A                        |
|                                  |                                |                             |                                 |                         |                         |       |                         |                      |                               |                      |        |         |        |              |           | 1.00      | 0.66    | 0.52  | 0.63 | Vitamin D                        |
|                                  |                                |                             |                                 |                         |                         |       |                         |                      |                               |                      |        |         |        |              |           |           | 1.00    | 0.52  | 0.65 | Calcium                          |
|                                  |                                |                             |                                 |                         |                         |       |                         |                      |                               |                      |        |         |        |              |           |           |         | 1.00  | 0.82 | Iron                             |
|                                  |                                |                             |                                 |                         |                         |       |                         |                      |                               |                      |        |         |        |              |           |           |         |       | 1.00 | Zinc                             |
| 1.00                             | 0.05                           | -0.01                       | 0.01                            | -0.01                   | 0.08                    | 0.00  | -0.03                   | 0.17                 | -0.05                         | 0.01                 | 0.17   | 0.17    | 0.18   | 0.02         | 0.01      | 0.06      | 0.60    | 0.03  | 0.10 | Animal fat, eggs, dairy products |
|                                  | 1.00                           | -0.09                       | -0.05                           | -0.11                   | 0.05                    | 0.03  | -0.04                   | 0.08                 | -0.02                         | -0.08                | 0.34   | 0.08    | 0.59   | 0.16         | -0.03     | 0.12      | 0.19    | 0.35  | 0.01 | Baked and fried flour products   |
|                                  |                                | 1.00                        | 0.03                            | 0.36                    | -0.01                   | 0.08  | 0.26                    | -0.05                | 0.05                          | 0.42                 | 0.56   | 0.49    | 0.29   | 0.64         | 0.11      | 0.02      | 0.05    | 0.41  | 0.46 | Flours, grains, and noodles      |
|                                  |                                |                             | 1.00                            | 0.07                    | -0.04                   | 0.08  | 0.08                    | -0.01                | 0.08                          | 0.09                 | 0.00   | -0.01   | -0.04  | -0.05        | 0.04      | 0.05      | -0.00   | -0.01 | 0.01 | Fruits and non-tuber vegetables  |
|                                  |                                |                             |                                 | 1.00                    | -0.02                   | 0.04  | 0.24                    | -0.06                | 0.05                          | 0.15                 | 0.46   | 0.68    | 0.26   | 0.27         | 0.38      | 0.19      | 0.03    | 0.65  | 0.72 | Meat, fish, and poultry          |
|                                  |                                |                             |                                 |                         | 1.00                    | 0.08  | -0.07                   | 0.08                 | -0.01                         | -0.04                | 0.14   | 0.12    | 0.11   | 0.06         | -0.02     | 0.12      | 0.53    | 0.04  | 0.06 | Milk (except fermented)          |
|                                  |                                |                             |                                 |                         |                         | 1.00  | 0.02                    | -0.02                | 0.03                          | 0.10                 | 0.08   | 0.05    | 0.08   | 0.05         | 0.02      | -0.00     | 0.05    | 0.07  | 0.05 | Salt                             |
|                                  |                                |                             |                                 |                         |                         |       | 1.00                    | -0.08                | 0.08                          | 0.21                 | 0.14   | 0.14    | 0.03   | 0.14         | 0.00      | 0.04      | -0.05   | 0.12  | 0.17 | Starchy root vegetables          |
|                                  |                                |                             |                                 |                         |                         |       |                         | 1.00                 | -0.01                         | -0.05                | 0.06   | 0.01    | 0.05   | 0.00         | -0.01     | 0.01      | 0.15    | 0.02  | 0.01 | Sugar and sweeteners             |
|                                  |                                |                             |                                 |                         |                         |       |                         |                      | 1.00                          | 0.02                 | 0.00   | -0.01   | -0.01  | -0.00        | 0.04      | 0.09      | -0.05   | 0.01  | 0.01 | Tea and coffee (solid equiv.)    |
|                                  |                                |                             |                                 |                         |                         |       |                         |                      |                               | 1.00                 | 0.27   | 0.19    | 0.07   | 0.19         | 0.01      | 0.01      | -0.01   | 0.16  | 0.16 | Vegetable oils (any)             |
|                                  |                                |                             |                                 |                         |                         |       |                         |                      |                               |                      | 1.00   | 0.87    | 0.76   | 0.76         | 0.18      | 0.11      | 0.36    | 0.84  | 0.79 | Energy                           |
|                                  |                                |                             |                                 |                         |                         |       |                         |                      |                               |                      |        | 1.00    | 0.60   | 0.65         | 0.32      | 0.16      | 0.35    | 0.85  | 0.93 | Protein                          |
|                                  |                                |                             |                                 |                         |                         |       |                         |                      |                               |                      |        |         | 1.00   | 0.57         | 0.23      | 0.03      | 0.32    | 0.76  | 0.54 | Folate                           |
|                                  |                                |                             |                                 |                         |                         |       |                         |                      |                               |                      |        |         |        | 1.00         | 0.11      | 0.02      | 0.17    | 0.62  | 0.62 | Phytosterols                     |
|                                  |                                |                             |                                 |                         |                         |       |                         |                      |                               |                      |        |         |        |              | 1.00      | 0.19      | -0.01   | 0.42  | 0.43 | Vitamin A                        |
|                                  |                                |                             |                                 |                         |                         |       |                         |                      |                               |                      |        |         |        |              |           | 1.00      | 0.12    | 0.17  | 0.13 | Vitamin D                        |



|      |      |      |         |
|------|------|------|---------|
| 1.00 | 0.22 | 0.19 | Calcium |
|      | 1.00 | 0.83 | Iron    |
|      |      | 1.00 | Zinc    |

55 Green-Yellow-Red shading indicates the magnitude of absolute correlation (Green: minimum observed absolute correlation; Yellow: median; Green:

56 maximum). Abbreviations: FCS-HH (2013 Food Consumption Survey); FCS-24 (nested 24-hour recall).

**Table S5.** Mean per-capita dietary intakes and intake densities (per 100 kcal), household consumption and consumption densities (per 100 kcal), and correlation between dietary-derived and household-derived per-capita measurements among 109 FCS-HH households fully-enumerated in the nested FCS-24 (Aim 1)

| Statistic:<br>Household Type:<br>Derivation of Statistic: |                                      | Mean Per-capita Intake or Consumption |         |                |                |                      |         |                |                | Mean Per-capita Intake or Consumption Density (per 100 kcal) |        |                |                |                      |        |                |                |
|-----------------------------------------------------------|--------------------------------------|---------------------------------------|---------|----------------|----------------|----------------------|---------|----------------|----------------|--------------------------------------------------------------|--------|----------------|----------------|----------------------|--------|----------------|----------------|
|                                                           |                                      | Multi-person (n=63)                   |         |                |                | Single-person (n=46) |         |                |                | Multi-person (n=63)                                          |        |                |                | Single-person (n=46) |        |                |                |
|                                                           |                                      | Diet                                  | HH      | r <sub>p</sub> | r <sub>s</sub> | Diet                 | HH      | r <sub>p</sub> | r <sub>s</sub> | Diet                                                         | HH     | r <sub>p</sub> | r <sub>s</sub> | Diet                 | HH     | r <sub>p</sub> | r <sub>s</sub> |
| Food Groups                                               | Animal fat, eggs, dairy products (g) | 111.9                                 | 343.4   | 0.17           | 0.35           | 61.1                 | 231.8   | 0.37           | 0.41           | 5.30                                                         | 7.35   | 0.14           | 0.37           | 4.05                 | 5.31   | 0.49           | 0.32           |
|                                                           | Baked and fried flour products (g)   | 112.5                                 | 206.4   | 0.03           | 0.07           | 87.2                 | 219.9   | 0.25           | 0.13           | 5.86                                                         | 4.50   | -0.10          | -0.02          | 5.98                 | 4.66   | 0.25           | 0.15           |
|                                                           | Flours, grains, and noodles (g)      | 243.4                                 | 409.4   | 0.02           | -0.02          | 221.7                | 433.9   | 0.19           | 0.19           | 12.44                                                        | 9.63   | 0.12           | 0.07           | 14.18                | 9.38   | 0.06           | 0.16           |
|                                                           | Fruits and non-tuber vegetables (g)  | 27.8                                  | 124.7   | 0.50           | 0.59           | 20.6                 | 162.4   | 0.16           | 0.16           | 1.39                                                         | 3.09   | 0.35           | 0.61           | 1.28                 | 3.39   | 0.15           | 0.10           |
|                                                           | Meat, fish, and poultry (g)          | 103.3                                 | 311.5   | 0.05           | 0.19           | 106.3                | 433.9   | 0.25           | 0.09           | 5.24                                                         | 7.11   | 0.14           | 0.13           | 6.83                 | 8.76   | 0.04           | -0.08          |
|                                                           | Milk (except fermented) (g)          | 100.7                                 | 447.9   | 0.16           | 0.35           | 78.1                 | 549.5   | 0.03           | 0.13           | 5.23                                                         | 9.89   | 0.16           | 0.26           | 6.09                 | 11.84  | 0.24           | 0.30           |
|                                                           | Salt (g)                             | 3.0                                   | 10.3    | -0.03          | 0.15           | 1.6                  | 11.1    | 0.01           | -0.11          | 0.18                                                         | 0.26   | -0.09          | 0.24           | 0.12                 | 0.28   | 0.38           | 0.22           |
|                                                           | Starchy root vegetables (g)          | 20.3                                  | 110.3   | 0.12           | 0.15           | 25.9                 | 172.2   | 0.14           | 0.26           | 1.04                                                         | 2.62   | -0.02          | 0.05           | 1.89                 | 3.68   | 0.28           | 0.23           |
|                                                           | Sugar and sweeteners (g)             | 5.4                                   | 29.9    | 0.17           | 0.20           | 5.1                  | 23.3    | 0.28           | 0.49           | 0.30                                                         | 0.67   | 0.17           | 0.08           | 0.43                 | 0.55   | 0.13           | 0.40           |
|                                                           | Tea and coffee (solid equiv.) (g)    | 2.6                                   | 7.3     | 0.08           | 0.00           | 2.2                  | 8.1     | 0.10           | -0.01          | 0.16                                                         | 0.18   | 0.12           | 0.07           | 0.17                 | 0.20   | 0.29           | -0.02          |
|                                                           | Vegetable oils (any) (g)             | 6.7                                   | 18.2    | 0.13           | 0.05           | 6.9                  | 27.4    | 0.16           | 0.00           | 0.33                                                         | 0.45   | 0.20           | 0.16           | 0.45                 | 0.64   | 0.14           | 0.00           |
| Macronutrients                                            | Energy (kcal)                        | 2070                                  | 4438    | 0.29           | 0.29           | 1583                 | 4767    | 0.09           | 0.14           | N/A                                                          | N/A    | N/A            | N/A            | N/A                  | N/A    | N/A            | N/A            |
|                                                           | Carbohydrates (g)                    | 262.49                                | 518.88  | 0.15           | 0.21           | 205.51               | 548.69  | 0.09           | 0.09           | 12.844                                                       | 11.883 | 0.08           | 0.19           | 13.113               | 11.682 | -0.11          | -0.13          |
|                                                           | Protein (g)                          | 74.28                                 | 189.21  | 0.28           | 0.36           | 60.22                | 218.59  | 0.20           | 0.14           | 3.633                                                        | 4.265  | 0.33           | 0.32           | 3.806                | 4.488  | 0.08           | -0.04          |
|                                                           | Total fat (g)                        | 72.54                                 | 174.90  | 0.28           | 0.37           | 55.89                | 186.46  | 0.01           | 0.09           | 3.527                                                        | 3.857  | 0.01           | 0.06           | 3.505                | 3.876  | -0.11          | -0.04          |
|                                                           | Alcohol (g)                          | 8.30                                  | 1.06    | 0.64           | 0.47           | 0.85                 | 0.89    | 0.80           | 0.47           | 0.258                                                        | 0.021  | 0.44           | 0.47           | 0.028                | 0.030  | 0.89           | 0.47           |
|                                                           | Water (g)                            | 567.40                                | 1785.34 | 0.25           | 0.30           | 473.91               | 2114.16 | -0.03          | -0.02          | 29.664                                                       | 40.752 | 0.10           | 0.09           | 32.100               | 46.582 | 0.17           | 0.09           |
|                                                           | Fiber (g)                            | 9.3                                   | 19.2    | 0.16           | 0.24           | 7.1                  | 21.8    | 0.18           | 0.10           | 0.45                                                         | 0.45   | 0.22           | 0.27           | 0.44                 | 0.45   | 0.04           | -0.04          |
|                                                           | Phytosterols (mg)                    | 434                                   | 917     | -0.06          | -0.04          | 392                  | 1082    | 0.11           | 0.11           | 21.8                                                         | 21.4   | 0.20           | 0.07           | 24.7                 | 23.2   | -0.10          | -0.05          |
| Vitamins                                                  | Thiamin (mg)                         | 0.780                                 | 1.831   | 0.16           | 0.15           | 0.653                | 2.288   | 0.25           | 0.11           | 0.0396                                                       | 0.0418 | 0.08           | 0.06           | 0.0432               | 0.0482 | 0.10           | 0.12           |
|                                                           | Riboflavin (mg)                      | 1.143                                 | 3.557   | 0.19           | 0.25           | 1.012                | 4.247   | 0.23           | 0.05           | 0.0586                                                       | 0.0800 | 0.09           | 0.13           | 0.0686               | 0.0901 | 0.07           | 0.16           |
|                                                           | Niacin (mg)                          | 12.498                                | 32.558  | 0.17           | 0.25           | 11.479               | 42.713  | 0.28           | 0.24           | 0.6351                                                       | 0.7379 | 0.27           | 0.28           | 0.7372               | 0.8635 | 0.06           | -0.07          |
|                                                           | Pantothenic acid (mg)                | 3.145                                 | 8.502   | 0.31           | 0.34           | 2.683                | 9.943   | 0.25           | 0.03           | 0.1582                                                       | 0.1942 | 0.21           | 0.14           | 0.1747               | 0.2107 | 0.15           | 0.25           |
|                                                           | Vitamin B6 (mg)                      | 0.579                                 | 1.565   | 0.34           | 0.36           | 0.514                | 1.931   | 0.17           | 0.18           | 0.0300                                                       | 0.0370 | 0.37           | 0.44           | 0.0325               | 0.0413 | 0.13           | 0.23           |
|                                                           | Folate (µg)                          | 141                                   | 307     | 0.20           | 0.26           | 100                  | 302     | 0.04           | 0.00           | 7.0                                                          | 6.8    | 0.13           | 0.11           | 6.3                  | 6.4    | 0.16           | 0.21           |
|                                                           | Vitamin B12 (µg)                     | 4.48                                  | 13.69   | 0.16           | 0.25           | 5.24                 | 13.29   | 0.37           | -0.05          | 0.234                                                        | 0.317  | 0.10           | 0.11           | 0.335                | 0.274  | 0.11           | -0.13          |
|                                                           | Vitamin C (mg)                       | 8.0                                   | 35.8    | 0.36           | 0.29           | 7.6                  | 43.6    | 0.18           | 0.26           | 0.41                                                         | 0.83   | 0.20           | 0.10           | 0.48                 | 0.91   | 0.04           | 0.09           |
|                                                           | Vitamin A (µg)                       | 330                                   | 900     | 0.12           | 0.14           | 289                  | 728     | 0.10           | 0.16           | 17.0                                                         | 21.2   | -0.08          | -0.06          | 19.4                 | 16.3   | -0.06          | 0.16           |
|                                                           | Vitamin D (IU)                       | 26                                    | 61      | 0.27           | 0.41           | 40                   | 73      | 0.35           | 0.12           | 1.4                                                          | 1.3    | 0.34           | 0.41           | 1.8                  | 1.5    | 0.24           | 0.10           |
|                                                           | Vitamin E (mg)                       | 5.38                                  | 12.92   | 0.17           | 0.18           | 4.74                 | 16.85   | 0.05           | -0.09          | 0.268                                                        | 0.301  | 0.20           | 0.16           | 0.286                | 0.377  | -0.01          | -0.10          |
| Minerals                                                  | Calcium (mg)                         | 460                                   | 1449    | 0.26           | 0.33           | 338                  | 1615    | 0.10           | 0.13           | 23.2                                                         | 32.3   | 0.15           | 0.28           | 24.0                 | 35.2   | 0.29           | 0.26           |
|                                                           | Copper (mg)                          | 0.809                                 | 2.097   | 0.18           | 0.18           | 0.827                | 2.560   | 0.41           | 0.27           | 0.0414                                                       | 0.0487 | 0.06           | 0.10           | 0.0538               | 0.0535 | 0.10           | 0.27           |
|                                                           | Iron (mg)                            | 9.85                                  | 22.80   | 0.20           | 0.24           | 8.56                 | 27.44   | 0.31           | 0.17           | 0.498                                                        | 0.522  | 0.22           | 0.22           | 0.545                | 0.564  | 0.07           | 0.04           |
|                                                           | Magnesium (mg)                       | 176                                   | 421     | 0.25           | 0.23           | 144                  | 471     | 0.06           | 0.01           | 8.6                                                          | 9.8    | 0.45           | 0.38           | 8.9                  | 10.0   | -0.02          | 0.02           |
|                                                           | Manganese (mg)                       | 2.257                                 | 4.791   | 0.11           | 0.15           | 1.797                | 5.285   | 0.15           | 0.10           | 0.1150                                                       | 0.1125 | 0.39           | 0.37           | 0.1158               | 0.1140 | 0.00           | 0.25           |
|                                                           | Phosphorus (mg)                      | 971                                   | 2512    | 0.27           | 0.27           | 750                  | 2857    | 0.06           | -0.03          | 48.2                                                         | 56.0   | 0.20           | 0.30           | 48.7                 | 60.0   | 0.16           | 0.19           |
|                                                           | Potassium (mg)                       | 1405                                  | 3997    | 0.28           | 0.32           | 1214                 | 5072    | 0.04           | 0.01           | 69.3                                                         | 92.1   | 0.30           | 0.33           | 77.3                 | 107.1  | 0.15           | 0.13           |

|           |       |       |      |      |      |       |      |      |       |       |      |      |       |       |      |       |
|-----------|-------|-------|------|------|------|-------|------|------|-------|-------|------|------|-------|-------|------|-------|
| Zinc (mg) | 10.49 | 29.84 | 0.13 | 0.27 | 9.77 | 38.27 | 0.19 | 0.16 | 0.514 | 0.672 | 0.19 | 0.22 | 0.617 | 0.777 | 0.09 | -0.05 |
|-----------|-------|-------|------|------|------|-------|------|------|-------|-------|------|------|-------|-------|------|-------|

Mean per-capita dietary-derived estimates and mean per-capita household-derived estimates are given in the "Diet" and "HH" columns, respectively.

Green-Yellow-Red shading indicates the magnitude of absolute percent difference between household consumption and dietary intake (Green: minimum observed absolute percent difference; Yellow: median; Green: maximum), and Blue-Yellow-Red shading indicates the magnitude of absolute percent difference between household consumption density and dietary intake density (per 100 kcal) (Blue: minimum observed absolute percent difference; Yellow: median; Red: maximum). Abbreviations: FCS-HH (2013 Food Consumption Survey), FCS-24 (nested 24-hour recall),  $r_p$  (Pearson correlation coefficient),  $r_s$  (Spearman rank correlation coefficient), IU (international unit; 40 IU = 1  $\mu$ g).

**Table S6.** Goodness of fit statistics for statistical disaggregation models of household food group and nutrient consumption

| Household Survey: |                                          |                      | FCS-HH  |                       | HSES-HH              |         |                       |
|-------------------|------------------------------------------|----------------------|---------|-----------------------|----------------------|---------|-----------------------|
|                   | Statistic:                               | % Deviance Explained | MAE     | (Mean HH Consumption) | % Deviance Explained | MAE     | (Mean HH Consumption) |
| Food Groups       | Animal fat, eggs, and dairy products (g) | 24.8                 | 552.0   | 687.2                 | 23.1                 | 259.4   | 303.5                 |
|                   | Baked and fried flour products (g)       | 12.8                 | 322.3   | 578.2                 | 19.3                 | 202.2   | 401.2                 |
|                   | Flours, grains, and noodles (g)          | 33.9                 | 352.9   | 1070.6                | 51.1                 | 251.1   | 635.2                 |
|                   | Fruits and non-tuber vegetables (g)      | 25.2                 | 218.1   | 375.6                 | 12.0                 | 161.7   | 235.0                 |
|                   | Meat, fish, and poultry (g)              | 14.2                 | 309.6   | 679.8                 | 27.2                 | 231.7   | 531.4                 |
|                   | Milk (except fermented) (g)              | 28.2                 | 553.9   | 843.5                 | 34.3                 | 446.0   | 671.4                 |
|                   | Salt (g)                                 | 16.7                 | 12.7    | 26.6                  | 12.9                 | 7.6     | 17.3                  |
|                   | Starchy root vegetables (g)              | 15.3                 | 212.2   | 365.6                 | 11.3                 | 129.1   | 206.4                 |
|                   | Sugar and sweeteners (g)                 | 24.5                 | 35.8    | 67.7                  | 17.9                 | 32.5    | 53.8                  |
|                   | Tea or coffee (solid equivalent) (g)     | 9.5                  | 9.7     | 14.3                  | 10.2                 | 9.5     | 14.5                  |
|                   | Vegetable oils (any) (g)                 | 13.5                 | 25.9    | 52.3                  | 7.6                  | 21.4    | 32.4                  |
| Macronutrients    | Energy (kcal)                            | 35.0                 | 3269    | 10765                 | 34.1                 | 2418    | 7191                  |
|                   | Carbohydrates (g)                        | 39.5                 | 386.22  | 1343.84               | 42.2                 | 278.32  | 858.80                |
|                   | Protein (g)                              | 27.8                 | 147.23  | 432.05                | 41.7                 | 105.00  | 293.08                |
|                   | Total fat (g)                            | 24.4                 | 156.74  | 400.55                | 19.4                 | 120.67  | 284.42                |
|                   | Alcohol (g)                              | 10.5                 | 4.42    | 2.78                  | 2.0                  | 5.32    | 2.91                  |
|                   | Water (g)                                | 24.2                 | 1480.79 | 4013.84               | 33.9                 | 1159.92 | 2900.21               |
|                   | Fiber (g)                                | 33.4                 | 15.8    | 52.6                  | 32.8                 | 10.9    | 33.0                  |
|                   | Phytosterols (mg)                        | 28.7                 | 849     | 2464                  | 37.8                 | 488     | 1394                  |
| Vitamins          | Thiamin (mg)                             | 26.8                 | 1.619   | 4.844                 | 23.2                 | 1.195   | 3.472                 |
|                   | Riboflavin (mg)                          | 24.9                 | 3.059   | 7.803                 | 33.8                 | 2.132   | 5.493                 |
|                   | Niacin (mg)                              | 23.8                 | 27.576  | 79.791                | 28.1                 | 19.840  | 56.814                |
|                   | Pantothenic acid (mg)                    | 26.7                 | 6.743   | 20.356                | 35.9                 | 5.004   | 14.181                |
|                   | Vitamin B6 (mg)                          | 27.8                 | 1.420   | 4.144                 | 24.7                 | 0.957   | 2.603                 |
|                   | Folate (µg)                              | 27.2                 | 269     | 751                   | 28.4                 | 174     | 528                   |
|                   | Vitamin B12 (µg)                         | 16.1                 | 14.04   | 27.44                 | 26.4                 | 10.87   | 20.95                 |
|                   | Vitamin C (mg)                           | 23.4                 | 56.5    | 110.5                 | 13.3                 | 40.9    | 74.3                  |
|                   | Vitamin A (µg)                           | 13.8                 | 1145    | 2027                  | 12.9                 | 923     | 1411                  |
|                   | Vitamin D (IU)                           | 15.1                 | 83      | 154                   | 11.5                 | 68      | 110                   |
|                   | Vitamin E (mg)                           | 21.3                 | 12.43   | 34.35                 | 13.7                 | 10.14   | 21.53                 |
| Minerals          | Calcium (mg)                             | 23.2                 | 1492    | 3105                  | 31.1                 | 1111    | 2262                  |
|                   | Copper (mg)                              | 30.5                 | 1.691   | 5.292                 | 32.7                 | 1.315   | 3.584                 |
|                   | Iron (mg)                                | 29.6                 | 17.89   | 57.26                 | 28.4                 | 12.86   | 39.53                 |
|                   | Magnesium (mg)                           | 31.6                 | 305     | 1028                  | 38.1                 | 233     | 688                   |
|                   | Manganese (mg)                           | 36.6                 | 3.519   | 12.357                | 40.4                 | 2.655   | 8.617                 |
|                   | Phosphorus (mg)                          | 30.6                 | 1955    | 5677                  | 38.8                 | 1313    | 3724                  |
|                   | Potassium (mg)                           | 24.5                 | 3182    | 9506                  | 34.1                 | 2382    | 6601                  |
|                   | Zinc (mg)                                | 25.5                 | 24.32   | 66.27                 | 39.0                 | 17.68   | 47.21                 |

70 % Deviance Explained =  $(1 - \text{Residual Deviance} / \text{Null Deviance}) * 100$ .  $p < 0.001$  for Chi-square residual deviance tests of goodness of fit for all food  
71 groups and nutrients. Mean total daily household consumption estimates from each household survey are provided for better interpretability of  
72 mean absolute error. Abbreviations: FCS-HH (2013 Food Consumption Survey), HSES-HH (2012/2014 Household Socio-Economic Survey), MAE  
73 (mean absolute error), HH (household), IU (international unit; 40 IU = 1  $\mu\text{g}$ ). Statistics are survey-weighted.

**Table S7.** Mean bias of household disaggregation methods in estimating ranks of food group and nutrient intakes and intake densities (per 100 kcal) across 14 age-sex groups (Aims 2 and 3)

| Validation Metric:<br>Household Survey:<br>Disaggregation Method: |                                          | Mean Rank Bias in Intake |     |     |                  |     |     | Mean Rank Bias in Intake Density (per 100 kcal) |     |     |                  |     |     |
|-------------------------------------------------------------------|------------------------------------------|--------------------------|-----|-----|------------------|-----|-----|-------------------------------------------------|-----|-----|------------------|-----|-----|
|                                                                   |                                          | FCS-HH (n=1012)          |     |     | HSES-HH (n=9424) |     |     | FCS-HH (n=1012)                                 |     |     | HSES-HH (n=9424) |     |     |
|                                                                   |                                          | SD1                      | SD2 | AME | SD1              | SD2 | AME | SD1                                             | SD2 | AME | SD1              | SD2 | AME |
| Food Groups                                                       | Animal fat, eggs, and dairy products (g) | 5.1                      | 5.0 | 5.1 | 4.4              | 5.0 | 5.0 | 3.9                                             | 3.6 | 4.6 | 4.3              | 4.6 | 5.3 |
|                                                                   | Baked and fried flour products (g)       | 5.6                      | 6.0 | 4.7 | 5.7              | 5.7 | 5.4 | 4.0                                             | 4.1 | 3.3 | 4.9              | 4.6 | 4.6 |
|                                                                   | Flours, grains, and noodles (g)          | 3.9                      | 4.4 | 2.9 | 3.4              | 5.4 | 4.7 | 3.4                                             | 4.1 | 2.3 | 1.6              | 3.0 | 1.9 |
|                                                                   | Fruits and non-tuber vegetables (g)      | 5.6                      | 5.6 | 5.6 | 5.6              | 5.7 | 6.3 | 5.3                                             | 4.9 | 3.7 | 3.1              | 3.1 | 4.6 |
|                                                                   | Meat, fish, and poultry (g)              | 5.1                      | 5.1 | 3.6 | 3.6              | 4.6 | 4.4 | 5.6                                             | 5.6 | 4.6 | 3.1              | 3.3 | 2.9 |
|                                                                   | Milk (except fermented) (g)              | 2.7                      | 3.1 | 3.0 | 2.0              | 2.3 | 2.7 | 1.6                                             | 1.7 | 3.0 | 3.6              | 4.0 | 4.0 |
|                                                                   | Salt (g)                                 | 4.1                      | 4.0 | 2.4 | 4.9              | 4.9 | 4.6 | 3.6                                             | 3.6 | 3.4 | 5.3              | 5.3 | 3.6 |
|                                                                   | Starchy root vegetables (g)              | 4.9                      | 5.1 | 5.0 | 3.6              | 4.7 | 5.4 | 4.9                                             | 4.4 | 3.1 | 2.4              | 2.4 | 2.1 |
|                                                                   | Sugar and sweeteners (g)                 | 3.9                      | 4.3 | 4.0 | 4.9              | 5.3 | 5.3 | 4.3                                             | 4.3 | 4.3 | 4.0              | 4.4 | 6.1 |
|                                                                   | Tea or coffee (solid equivalent) (g)     | 5.0                      | 4.7 | 4.3 | 4.3              | 4.3 | 3.7 | 4.4                                             | 4.4 | 4.4 | 3.6              | 3.4 | 4.6 |
|                                                                   | Vegetable oils (any) (g)                 | 4.6                      | 5.0 | 4.6 | 2.0              | 3.4 | 4.0 | 4.1                                             | 4.3 | 4.1 | 3.4              | 3.3 | 4.1 |
| Macronutrients                                                    | Energy (kcal)                            | 4.0                      | 4.3 | 3.1 | 4.7              | 5.3 | 4.7 | N/A                                             | N/A | N/A | N/A              | N/A | N/A |
|                                                                   | Carbohydrates (g)                        | 3.3                      | 4.1 | 3.3 | 4.6              | 5.3 | 4.7 | 3.4                                             | 3.3 | 3.9 | 4.7              | 4.0 | 3.6 |
|                                                                   | Protein (g)                              | 5.0                      | 5.0 | 4.0 | 4.7              | 5.1 | 5.0 | 4.6                                             | 4.3 | 3.3 | 3.0              | 3.0 | 4.1 |
|                                                                   | Total fat (g)                            | 5.7                      | 5.4 | 4.1 | 4.9              | 4.9 | 5.0 | 4.1                                             | 4.6 | 4.9 | 4.6              | 4.0 | 4.1 |
|                                                                   | Alcohol (g)                              | 3.3                      | 3.1 | 2.9 | 2.2              | 2.1 | 3.1 | 3.4                                             | 3.1 | 4.3 | 1.9              | 1.8 | 2.1 |
|                                                                   | Water (g)                                | 5.9                      | 5.6 | 4.6 | 5.1              | 5.0 | 4.7 | 4.4                                             | 4.4 | 4.0 | 3.7              | 3.4 | 3.9 |
|                                                                   | Fiber (g)                                | 3.6                      | 4.1 | 3.1 | 4.1              | 4.9 | 4.3 | 4.6                                             | 4.0 | 5.0 | 5.9              | 5.0 | 5.3 |
|                                                                   | Phytosterols (mg)                        | 4.7                      | 4.9 | 3.4 | 4.9              | 5.1 | 4.6 | 5.1                                             | 5.6 | 6.0 | 4.7              | 4.4 | 4.9 |
| Vitamins                                                          | Thiamin (mg)                             | 4.3                      | 4.7 | 3.7 | 4.7              | 4.7 | 4.3 | 3.4                                             | 3.4 | 4.3 | 3.7              | 3.3 | 4.0 |
|                                                                   | Riboflavin (mg)                          | 6.0                      | 6.0 | 4.7 | 4.7              | 4.9 | 4.7 | 3.0                                             | 3.1 | 3.1 | 4.4              | 4.4 | 3.7 |
|                                                                   | Niacin (mg)                              | 5.0                      | 5.0 | 3.6 | 4.1              | 4.9 | 4.3 | 6.4                                             | 6.3 | 6.3 | 5.1              | 4.6 | 5.7 |
|                                                                   | Pantothenic acid (mg)                    | 5.6                      | 5.4 | 4.1 | 4.9              | 4.9 | 4.9 | 5.0                                             | 5.0 | 4.0 | 4.0              | 4.0 | 5.1 |
|                                                                   | Vitamin B6 (mg)                          | 4.6                      | 4.6 | 3.6 | 4.7              | 4.7 | 4.4 | 6.0                                             | 5.7 | 5.0 | 5.1              | 4.9 | 4.0 |
|                                                                   | Folate (µg)                              | 4.3                      | 4.7 | 3.4 | 4.7              | 5.0 | 4.7 | 6.0                                             | 5.6 | 4.9 | 5.0              | 5.3 | 3.6 |
|                                                                   | Vitamin B12 (µg)                         | 6.6                      | 6.6 | 3.9 | 5.0              | 4.9 | 4.3 | 6.7                                             | 6.7 | 5.9 | 4.9              | 4.9 | 4.6 |
|                                                                   | Vitamin C (mg)                           | 5.7                      | 5.7 | 5.3 | 4.9              | 5.7 | 6.3 | 4.6                                             | 5.3 | 4.9 | 3.4              | 3.1 | 4.6 |
|                                                                   | Vitamin A (µg)                           | 6.6                      | 6.7 | 3.9 | 5.3              | 5.3 | 4.1 | 6.9                                             | 7.0 | 6.0 | 6.4              | 6.4 | 6.0 |
|                                                                   | Vitamin D (IU)                           | 4.7                      | 4.7 | 4.4 | 5.9              | 5.9 | 4.7 | 4.3                                             | 4.4 | 3.9 | 4.9              | 5.0 | 4.7 |
|                                                                   | Vitamin E (mg)                           | 4.6                      | 5.3 | 4.0 | 3.4              | 4.6 | 4.0 | 6.1                                             | 5.7 | 6.0 | 6.3              | 6.1 | 5.7 |
| Minerals                                                          | Calcium (mg)                             | 6.6                      | 6.4 | 5.9 | 6.1              | 6.0 | 5.9 | 3.1                                             | 2.6 | 3.9 | 4.1              | 4.3 | 3.9 |
|                                                                   | Copper (mg)                              | 4.6                      | 5.1 | 2.7 | 4.1              | 5.1 | 4.3 | 6.0                                             | 6.0 | 6.3 | 5.6              | 6.0 | 5.3 |
|                                                                   | Iron (mg)                                | 3.9                      | 4.6 | 2.9 | 4.7              | 4.6 | 4.6 | 5.6                                             | 5.1 | 5.7 | 4.6              | 4.4 | 4.6 |
|                                                                   | Magnesium (mg)                           | 4.7                      | 5.0 | 4.1 | 5.1              | 5.3 | 5.0 | 3.4                                             | 3.1 | 3.4 | 2.9              | 3.0 | 3.3 |
|                                                                   | Manganese (mg)                           | 3.6                      | 4.1 | 3.1 | 4.9              | 5.0 | 4.6 | 4.9                                             | 4.6 | 6.0 | 5.1              | 4.6 | 5.6 |
|                                                                   | Phosphorus (mg)                          | 5.4                      | 5.3 | 4.7 | 5.1              | 5.1 | 5.0 | 1.7                                             | 1.6 | 3.1 | 4.0              | 4.3 | 4.3 |
|                                                                   | Potassium (mg)                           | 5.0                      | 5.0 | 4.7 | 5.1              | 5.1 | 5.1 | 3.3                                             | 3.4 | 4.3 | 3.6              | 4.1 | 4.0 |
|                                                                   | Zinc (mg)                                | 5.3                      | 5.0 | 4.1 | 4.7              | 5.0 | 5.0 | 4.6                                             | 4.3 | 4.3 | 3.0              | 2.9 | 4.4 |

77  
78  
79 Green-Yellow-Red shading indicates the magnitude of mean bias in estimated ranks of intake (Green: minimum observed mean rank bias; Yellow:  
80 median; red: maximum), and Blue-Yellow-Red shading indicates magnitude of mean bias in estimated ranks of intake density (per 100 kcal) (Blue:  
81 minimum observed absolute mean rank bias; Yellow: median; Red: maximum). Abbreviations: FCS-HH (2013 Food Consumption Survey), HSES-HH  
82 (2012/2014 Household Socio-Economic Survey), SD1 (unadjusted statistical disaggregation method), SD2 (AME-like statistical disaggregation  
83 method), IU (international unit; 40 IU = 1 µg). Statistics are survey weighted.

**Table S8.** In-sample fit statistics for increasingly complex predictive models of individuals' dietary intakes and intake densities (per 100 kcal) in the FCS-24 (Aim 4)

| Measurement Type:<br>Validation Metric: |                       | Nutrient Intake                               |      |      |      |      |      |      |                     |       |       |       |       |       |       |       |       |        |        |  |
|-----------------------------------------|-----------------------|-----------------------------------------------|------|------|------|------|------|------|---------------------|-------|-------|-------|-------|-------|-------|-------|-------|--------|--------|--|
|                                         |                       | 1 / (Residual Deviance / Null Deviance) * 100 |      |      |      |      |      |      | Mean Absolute Error |       |       |       |       |       |       |       |       |        | (AME   |  |
| Model Designation:                      |                       | 1                                             | 2    | 3    | 4a   | 4b   | 4c   | 5    | 1                   | 2     | 3     | 4a    | 4b    | 4c    | 5     | (SD1) | (SD2) | )      | Intake |  |
| Macronutrients                          | Energy (kcal)         | 53.6                                          | 52.9 | 51.9 | 59.3 | 66.0 | 68.3 | 71.8 | 229                 | 231   | 229   | 209   | 191   | 185   | 178   | 384   | 1344  | 1095   | 1864   |  |
|                                         | Carbohydrates (g)     |                                               |      |      |      |      |      |      |                     |       |       |       |       |       |       |       | 136.6 |        | 241.10 |  |
|                                         |                       | 44.7                                          | 45.7 | 44.8 | 52.4 | 60.2 | 67.4 | 62.4 | 35.65               | 35.58 | 35.92 | 32.63 | 30.28 | 27.49 | 29.57 | 56.58 | 3     | 126.35 |        |  |
|                                         | Protein (g)           | 54.1                                          | 55.3 | 56.7 | 60.8 | 68.2 | 69.7 | 71.5 | 8.83                | 8.67  | 8.75  | 8.47  | 7.25  | 7.12  | 7.01  | 20.85 | 65.01 | 50.15  | 70.09  |  |
|                                         | Total fat (g)         | 40.8                                          | 42.5 | 45.8 | 50.1 | 55.0 | 64.9 | 65.3 | 9.92                | 9.86  | 9.62  | 9.49  | 8.40  | 7.77  | 7.72  | 23.12 | 69.22 | 47.73  | 66.38  |  |
|                                         | Alcohol (g)           | 91.9                                          | 92.0 | 94.6 | 94.6 | 95.4 | 99.1 | 99.0 | 0.73                | 0.68  | 0.33  | 0.30  | 0.41  | 0.30  | 0.31  | 1.60  | 1.58  | 1.62   | 1.47   |  |
|                                         | Water (g)             |                                               |      |      |      |      |      |      | 133.4               | 129.5 | 129.2 | 116.1 | 110.9 |       |       | 255.6 | 725.6 |        | 572.27 |  |
|                                         |                       | 29.0                                          | 34.1 | 30.0 | 43.4 | 48.0 | 61.7 | 64.1 | 6                   | 2     | 1     | 7     | 2     | 99.64 | 95.32 | 1     | 1     | 572.34 |        |  |
| Vitamins                                | Fiber (g)             | 48.8                                          | 48.1 | 48.2 | 56.0 | 61.6 | 71.5 | 72.8 | 1.1                 | 1.1   | 1.1   | 1.0   | 1.0   | 0.9   | 0.9   | 2.3   | 6.5   | 5.8    | 8.6    |  |
|                                         | Phytosterols (mg)     | 56.3                                          | 55.4 | 53.5 | 60.1 | 68.0 | 75.0 | 75.7 | 50                  | 51    | 51    | 47    | 42    | 40    | 42    | 140   | 316   | 262    | 424    |  |
|                                         | Thiamin (mg)          | 37.9                                          | 37.9 | 39.6 | 47.2 | 54.8 | 62.4 | 63.5 | 0.107               | 0.108 | 0.104 | 0.097 | 0.088 | 0.084 | 0.085 | 0.252 | 0.727 | 0.567  | 0.784  |  |
|                                         | Riboflavin (mg)       | 31.0                                          | 35.7 | 31.8 | 40.5 | 47.0 | 70.2 | 71.8 | 0.207               | 0.196 | 0.201 | 0.181 | 0.174 | 0.137 | 0.141 | 0.468 | 1.266 | 1.027  | 1.220  |  |
|                                         | Niacin (mg)           |                                               |      |      |      |      |      |      |                     |       |       |       |       |       |       |       | 13.03 |        | 13.064 |  |
|                                         |                       | 57.2                                          | 58.5 | 60.2 | 64.5 | 67.3 | 74.1 | 75.4 | 1.394               | 1.389 | 1.352 | 1.273 | 1.187 | 1.135 | 1.162 | 4.066 | 1     | 9.522  |        |  |
|                                         | Pantothenic acid (mg) |                                               |      |      |      |      |      |      |                     |       |       |       |       |       |       |       |       |        | 3.111  |  |
|                                         |                       | 37.6                                          | 37.7 | 38.5 | 44.9 | 52.2 | 66.1 | 69.6 | 0.443               | 0.450 | 0.458 | 0.430 | 0.392 | 0.334 | 0.334 | 1.087 | 3.143 | 2.421  |        |  |
|                                         | Vitamin B6 (mg)       | 44.7                                          | 44.8 | 46.1 | 52.0 | 62.2 | 69.8 | 69.7 | 0.103               | 0.104 | 0.099 | 0.094 | 0.084 | 0.075 | 0.079 | 0.235 | 0.692 | 0.542  | 0.628  |  |
|                                         | Folate (µg)           | 41.1                                          | 40.2 | 38.2 | 48.3 | 52.9 | 72.4 | 72.4 | 25                  | 25    | 24    | 22    | 22    | 17    | 17    | 37    | 100   | 81     | 132    |  |
|                                         | Vitamin B12 (µg)      | 67.4                                          | 68.7 | 71.9 | 73.2 | 76.1 | 90.5 | 91.5 | 1.10                | 0.96  | 1.06  | 1.04  | 0.95  | 0.61  | 0.61  | 2.96  | 4.44  | 3.00   | 6.35   |  |
|                                         | Vitamin C (mg)        | 42.5                                          | 42.1 | 46.5 | 49.8 | 56.1 | 83.4 | 83.2 | 1.5                 | 1.4   | 1.4   | 1.3   | 1.2   | 0.8   | 0.8   | 7.2   | 24.3  | 20.8   | 12.4   |  |
| Minerals                                | Vitamin A (µg)        | 59.0                                          | 62.7 | 63.8 | 65.3 | 67.7 | 90.1 | 88.0 | 109                 | 95    | 95    | 95    | 97    | 53    | 59    | 227   | 389   | 266    | 448    |  |
|                                         | Vitamin D (IU)        | 31.0                                          | 34.6 | 31.7 | 36.0 | 46.5 | 77.4 | 78.1 | 6                   | 6     | 6     | 6     | 6     | 4     | 4     | 13    | 33    | 24     | 26     |  |
|                                         | Vitamin E (mg)        | 28.2                                          | 27.7 | 29.1 | 57.3 | 63.0 | 64.5 | 70.0 | 0.97                | 0.98  | 0.96  | 0.75  | 0.69  | 0.67  | 0.65  | 1.73  | 5.35  | 4.39   | 5.28   |  |
|                                         | Calcium (mg)          | 29.2                                          | 34.2 | 33.9 | 50.1 | 55.0 | 68.7 | 68.5 | 112                 | 108   | 109   | 95    | 89    | 74    | 78    | 227   | 569   | 483    | 432    |  |
|                                         | Copper (mg)           | 58.6                                          | 59.8 | 60.4 | 62.7 | 67.7 | 85.2 | 84.7 | 0.152               | 0.153 | 0.149 | 0.138 | 0.135 | 0.097 | 0.101 | 0.325 | 0.681 | 0.550  | 0.986  |  |
|                                         | Iron (mg)             | 49.4                                          | 47.8 | 51.9 | 55.4 | 61.5 | 68.7 | 68.6 | 1.34                | 1.35  | 1.29  | 1.27  | 1.15  | 1.10  | 1.12  | 2.59  | 7.60  | 5.98   | 10.03  |  |
|                                         | Magnesium (mg)        | 49.8                                          | 49.8 | 48.3 | 57.9 | 62.1 | 69.2 | 70.5 | 23                  | 23    | 24    | 21    | 20    | 18    | 18    | 51    | 143   | 116    | 168    |  |
|                                         | Manganese (mg)        | 52.6                                          | 52.4 | 50.7 | 61.1 | 65.0 | 70.6 | 72.1 | 0.292               | 0.295 | 0.297 | 0.263 | 0.249 | 0.239 | 0.240 | 0.495 | 1.337 | 1.239  | 2.172  |  |
| Minerals                                | Phosphorus (mg)       | 52.5                                          | 54.2 | 52.9 | 58.9 | 62.3 | 70.6 | 69.2 | 120                 | 117   | 117   | 109   | 104   | 97    | 99    | 279   | 846   | 667    | 907    |  |
|                                         | Potassium (mg)        | 39.0                                          | 39.0 | 36.9 | 43.2 | 48.7 | 63.8 | 63.7 | 205                 | 204   | 210   | 199   | 182   | 160   | 159   | 491   | 1657  | 1223   | 1436   |  |
|                                         | Zinc (mg)             | 61.9                                          | 63.2 | 62.7 | 67.9 | 71.8 | 73.2 | 74.7 | 1.14                | 1.17  | 1.15  | 1.07  | 0.99  | 0.98  | 0.99  | 3.40  | 11.30 | 7.88   | 10.85  |  |
| Measurement Type:                       |                       | Nutrient Intake Density (per 100 kcal)        |      |      |      |      |      |      |                     |       |       |       |       |       |       |       |       |        |        |  |
| Validation Metric:                      |                       | 1 / (Residual Deviance / Null Deviance) * 100 |      |      |      |      |      |      | Mean Absolute Error |       |       |       |       |       |       |       |       |        | (AME   |  |
| Model Designation:                      |                       | 1                                             | 2    | 3    | 4a   | 4b   | 4c   | 5    | 1                   | 2     | 3     | 4a    | 4b    | 4c    | 5     | (SD1) | (SD2) | )      | Densit |  |



|                |                       | y    |      |      |      |      |      |      |       |       |       |       |       |       |       |       |       |        |        |     |
|----------------|-----------------------|------|------|------|------|------|------|------|-------|-------|-------|-------|-------|-------|-------|-------|-------|--------|--------|-----|
|                |                       | N/A   | N/A   | N/A   | N/A   | N/A   | N/A   | N/A   | N/A   | N/A   | N/A    | N/A    | N/A |
| Macronutrients | Energy (kcal)         | N/A   | N/A   | N/A   | N/A   | N/A   | N/A   | N/A   | N/A   | N/A   | N/A    | N/A    | N/A |
|                | Carbohydrates (g)     | 6.7  | 11.1 | 9.8  | 24.0 | 35.3 | 47.3 | 45.9 | 0.856 | 0.856 | 0.853 | 0.798 | 0.734 | 0.697 | 0.699 | 1.358 | 1.575 | 1.135  | 12.920 |     |
|                | Protein (g)           | 13.6 | 14.7 | 14.4 | 26.3 | 39.5 | 51.8 | 52.8 | 0.292 | 0.296 | 0.297 | 0.283 | 0.240 | 0.228 | 0.235 | 0.418 | 0.517 | 0.370  | 3.777  |     |
|                | Total fat (g)         | 23.2 | 25.0 | 25.7 | 34.9 | 48.4 | 61.5 | 57.4 | 0.291 | 0.285 | 0.287 | 0.269 | 0.243 | 0.226 | 0.225 | 0.569 | 0.703 | 0.378  | 3.574  |     |
|                | Alcohol (g)           | 88.3 | 88.5 | 91.9 | 92.4 | 92.6 | 97.4 | 96.8 | 0.029 | 0.031 | 0.020 | 0.019 | 0.017 | 0.014 | 0.014 | 0.068 | 0.066 | 0.064  | 0.067  |     |
|                | Water (g)             |      |      |      |      |      |      |      |       |       |       |       |       |       |       |       | 11.70 |        |        |     |
|                |                       | 14.2 | 18.7 | 12.9 | 24.4 | 35.4 | 59.1 | 59.3 | 6.566 | 6.496 | 6.620 | 6.373 | 5.940 | 4.608 | 4.513 | 8.816 | 6     | 11.055 | 31.081 |     |
|                | Fiber (g)             | 27.6 | 31.7 | 30.7 | 36.1 | 47.0 | 67.7 | 65.6 | 0.04  | 0.04  | 0.04  | 0.03  | 0.03  | 0.03  | 0.03  | 0.08  | 0.06  | 0.10   | 0.47   |     |
|                | Phytosterols (mg)     | 16.7 | 17.6 | 18.9 | 27.2 | 37.9 | 69.8 | 64.9 | 2.0   | 2.0   | 2.1   | 2.0   | 1.8   | 1.4   | 1.6   | 5.0   | 3.5   | 3.3    | 22.9   |     |
| Vitamins       | Thiamin (mg)          |      |      |      |      |      |      |      | 0.003 | 0.003 | 0.004 | 0.003 | 0.003 | 0.002 | 0.002 | 0.006 | 0.006 |        | 0.0426 |     |
|                |                       | 17.7 | 19.1 | 19.3 | 32.1 | 39.0 | 61.2 | 65.0 | 9     | 9     | 0     | 7     | 4     | 8     | 8     | 2     | 3     | 0.0065 |        |     |
|                | Riboflavin (mg)       |      |      |      |      |      |      |      | 0.009 | 0.009 | 0.009 | 0.008 | 0.008 | 0.006 | 0.005 | 0.013 | 0.016 |        | 0.0661 |     |
|                |                       | 11.6 | 13.9 | 13.5 | 25.8 | 40.2 | 71.0 | 76.0 | 6     | 6     | 5     | 9     | 8     | 1     | 3     | 8     | 3     | 0.0122 |        |     |
|                | Niacin (mg)           |      |      |      |      |      |      |      | 0.061 | 0.061 | 0.063 | 0.057 | 0.054 | 0.043 | 0.045 | 0.123 | 0.143 |        | 0.7093 |     |
|                |                       | 40.5 | 41.8 | 39.5 | 45.7 | 52.9 | 67.2 | 70.9 | 2     | 9     | 0     | 8     | 5     | 8     | 2     | 6     | 2     | 0.1170 |        |     |
|                | Pantothenic acid (mg) |      |      |      |      |      |      |      | 0.019 | 0.019 | 0.019 | 0.018 | 0.016 | 0.012 | 0.011 | 0.029 | 0.032 |        | 0.1686 |     |
|                |                       | 16.6 | 13.4 | 12.7 | 23.7 | 38.4 | 63.8 | 70.5 | 1     | 1     | 5     | 3     | 9     | 9     | 6     | 2     | 7     | 0.0314 |        |     |
|                | Vitamin B6 (mg)       |      |      |      |      |      |      |      | 0.004 | 0.004 | 0.004 | 0.004 | 0.004 | 0.003 | 0.003 | 0.009 | 0.010 |        | 0.0342 |     |
|                |                       | 43.6 | 45.6 | 47.1 | 51.9 | 54.3 | 71.4 | 71.7 | 7     | 7     | 7     | 4     | 4     | 3     | 4     | 3     | 2     | 0.0101 |        |     |
|                | Folate (µg)           | 17.1 | 19.8 | 20.3 | 28.2 | 32.8 | 66.2 | 65.8 | 0.9   | 0.9   | 0.9   | 0.8   | 0.8   | 0.6   | 0.6   | 1.0   | 1.0   | 1.0    | 7.1    |     |
|                | Vitamin B12 (µg)      | 57.4 | 59.7 | 57.4 | 61.3 | 68.7 | 85.5 | 86.3 | 0.057 | 0.057 | 0.058 | 0.053 | 0.046 | 0.036 | 0.036 | 0.137 | 0.131 | 0.091  | 0.339  |     |
| Minerals       | Vitamin C (mg)        | 55.6 | 55.0 | 55.1 | 59.2 | 64.5 | 79.8 | 79.4 | 0.11  | 0.11  | 0.11  | 0.11  | 0.10  | 0.08  | 0.08  | 0.35  | 0.56  | 0.60   | 0.70   |     |
|                | Vitamin A (µg)        | 53.3 | 57.3 | 56.9 | 59.6 | 60.9 | 87.8 | 86.2 | 5.3   | 5.1   | 5.0   | 4.7   | 4.8   | 2.8   | 3.1   | 11.0  | 11.5  | 8.4    | 23.7   |     |
|                | Vitamin D (IU)        | 42.1 | 46.7 | 41.2 | 46.1 | 54.9 | 82.2 | 80.3 | 0.3   | 0.3   | 0.3   | 0.3   | 0.3   | 0.2   | 0.2   | 0.6   | 0.7   | 0.4    | 1.4    |     |
|                | Vitamin E (mg)        | 9.7  | 13.0 | 7.7  | 39.5 | 50.3 | 62.1 | 57.7 | 0.043 | 0.043 | 0.042 | 0.034 | 0.032 | 0.028 | 0.031 | 0.057 | 0.069 | 0.091  | 0.286  |     |
|                | Calcium (mg)          | 28.1 | 32.9 | 33.8 | 48.4 | 57.4 | 73.4 | 72.7 | 5.6   | 5.6   | 5.5   | 4.8   | 4.5   | 3.6   | 3.6   | 7.8   | 9.4   | 7.9    | 23.6   |     |
|                | Copper (mg)           |      |      |      |      |      |      |      | 0.006 | 0.007 | 0.007 | 0.007 | 0.007 | 0.004 | 0.004 | 0.015 | 0.013 |        | 0.0528 |     |
|                |                       | 47.0 | 50.9 | 48.8 | 50.8 | 54.5 | 84.6 | 85.0 | 8     | 4     | 7     | 1     | 8     | 1     | 3     | 1     | 3     | 0.0129 |        |     |
|                | Iron (mg)             | 14.7 | 14.9 | 16.1 | 24.9 | 33.2 | 63.7 | 64.0 | 0.045 | 0.045 | 0.045 | 0.043 | 0.040 | 0.030 | 0.032 | 0.056 | 0.054 | 0.059  | 0.541  |     |
|                | Magnesium (mg)        | 21.1 | 21.1 | 21.7 | 27.3 | 27.8 | 60.8 | 56.3 | 0.6   | 0.7   | 0.7   | 0.7   | 0.6   | 0.5   | 0.5   | 1.0   | 1.0   | 1.1    | 9.1    |     |
|                | Manganese (mg)        |      |      |      |      |      |      |      | 0.009 | 0.009 | 0.009 | 0.008 | 0.008 | 0.007 | 0.007 | 0.014 | 0.014 |        | 0.1171 |     |
|                |                       | 41.3 | 43.1 | 44.6 | 49.1 | 55.6 | 64.6 | 66.9 | 3     | 1     | 7     | 6     | 6     | 2     | 1     | 6     | 9     | 0.0200 |        |     |
|                | Phosphorus (mg)       | 31.8 | 34.1 | 32.6 | 43.5 | 48.9 | 70.0 | 70.3 | 3.6   | 3.6   | 3.7   | 3.3   | 3.2   | 2.5   | 2.5   | 4.9   | 6.5   | 4.7    | 48.9   |     |
|                | Potassium (mg)        | 16.8 | 16.6 | 16.5 | 22.5 | 32.9 | 54.2 | 54.5 | 8.6   | 8.6   | 8.8   | 8.5   | 8.2   | 6.6   | 6.4   | 12.6  | 19.6  | 15.7   | 78.1   |     |
|                | Zinc (mg)             | 24.9 | 24.6 | 23.8 | 35.2 | 42.5 | 56.9 | 49.7 | 0.053 | 0.053 | 0.053 | 0.048 | 0.045 | 0.041 | 0.044 | 0.099 | 0.126 | 0.076  | 0.587  |     |

See Table 4 for detailed descriptions of models 1-5. Brief description of variable categories considered for selection in each model: (1) Household and individual demographic, socioeconomic, and lifestyle characteristics, (2) Model 1 variables + quantitative total household consumption of food groups and nutrients, (3) Model 2 variables + individuals' self-evaluation of nutrition knowledge and its application to their lives, (4a) Model 3 variables + cursory qualitative 24-hour recall and assessment of eating behaviors, (4b) Model 3 variables + cursory semiquantitative 24-hour recall and assessment of eating behaviors, (4c) Model 3 variables + detailed semiquantitative 24-hour recall, (5) Model 4 variables + measured

anthropometry. For comparison with mean absolute error of prediction models 1-5, mean absolute error of unadjusted and AME-like statistical disaggregation and adult male equivalent methods applied to the FCS-HH are provided in columns "(SD1)", "(SD2)", and "(AME)", respectively. Mean dietary intake and intake density from the FCS-24 are also provided in the "Intake" and "Density" columns for better interpretability of all mean absolute error estimates. Green-Yellow-Red shading indicates the magnitude of mean absolute error in predicting dietary nutrient intake proportional to mean observed dietary intake (Green: minimum absolute error; Yellow: median; Red: maximum) and Blue-Yellow-Red shading indicates the magnitude of mean absolute error in predicting dietary nutrient intake density proportional to mean observed dietary intake density (per 100 kcal) (Blue: minimum absolute error; Yellow: median; Red: maximum). Abbreviations: FCS-HH (2013 Food Consumption Survey), FCS-24 (nested 24-hour recall), IU (international unit; 40 IU = 1 µg).

**Table S9.** Mean absolute error of alternate prediction methods of individuals' dietary intake densities of nutrients in the FCS-24: direct prediction of nutrient densities (left) vs. estimation based on separate prediction of nutrient intake and energy intake (right) (Aim 4)

| Prediction Method:<br>Model Designation: |                       | Direct Prediction of Nutrient Intake Densities |        |        |        |        |        |        | Separate Prediction of Nutrient and Energy Intake |        |        |        |        |        |        | Density |
|------------------------------------------|-----------------------|------------------------------------------------|--------|--------|--------|--------|--------|--------|---------------------------------------------------|--------|--------|--------|--------|--------|--------|---------|
|                                          |                       | 1                                              | 2      | 3      | 4a     | 4b     | 4c     | 5      | 1                                                 | 2      | 3      | 4a     | 4b     | 4c     | 5      |         |
| Macronutrients                           | Energy (kcal)         | N/A                                            | N/A    | N/A    | N/A    | N/A    | N/A    | N/A    | N/A                                               | N/A    | N/A    | N/A    | N/A    | N/A    | N/A    | N/A     |
|                                          | Carbohydrates (g)     | 0.856                                          | 0.856  | 0.853  | 0.798  | 0.734  | 0.697  | 0.699  | 0.833                                             | 0.879  | 0.814  | 0.784  | 0.814  | 0.733  | 0.728  | 12.920  |
|                                          | Protein (g)           | 0.292                                          | 0.296  | 0.297  | 0.283  | 0.240  | 0.228  | 0.235  | 0.279                                             | 0.284  | 0.280  | 0.271  | 0.262  | 0.229  | 0.229  | 3.777   |
|                                          | Total fat (g)         | 0.291                                          | 0.285  | 0.287  | 0.269  | 0.243  | 0.226  | 0.225  | 0.288                                             | 0.280  | 0.277  | 0.274  | 0.273  | 0.215  | 0.212  | 3.574   |
|                                          | Alcohol (g)           | 0.029                                          | 0.031  | 0.020  | 0.019  | 0.017  | 0.014  | 0.014  | 0.029                                             | 0.032  | 0.018  | 0.019  | 0.018  | 0.012  | 0.016  | 0.067   |
|                                          | Water (g)             | 6.566                                          | 6.496  | 6.620  | 6.373  | 5.940  | 4.608  | 4.513  | 6.292                                             | 6.100  | 6.289  | 5.977  | 5.718  | 4.529  | 4.441  | 31.081  |
|                                          | Fiber (g)             | 0.04                                           | 0.04   | 0.04   | 0.03   | 0.03   | 0.03   | 0.03   | 0.04                                              | 0.04   | 0.04   | 0.03   | 0.03   | 0.03   | 0.03   | 0.47    |
|                                          | Phytosterols (mg)     | 2.0                                            | 2.0    | 2.1    | 2.0    | 1.8    | 1.4    | 1.6    | 1.9                                               | 1.9    | 2.1    | 1.9    | 1.8    | 1.6    | 1.8    | 22.9    |
| Vitamins                                 | Thiamin (mg)          | 0.0039                                         | 0.0039 | 0.0040 | 0.0037 | 0.0034 | 0.0028 | 0.0028 | 0.0038                                            | 0.0037 | 0.0038 | 0.0034 | 0.0033 | 0.0028 | 0.0027 | 0.0426  |
|                                          | Riboflavin (mg)       | 0.0096                                         | 0.0096 | 0.0095 | 0.0089 | 0.0088 | 0.0061 | 0.0053 | 0.0090                                            | 0.0090 | 0.0090 | 0.0086 | 0.0083 | 0.0062 | 0.0057 | 0.0661  |
|                                          | Niacin (mg)           | 0.0612                                         | 0.0619 | 0.0630 | 0.0578 | 0.0545 | 0.0438 | 0.0452 | 0.0615                                            | 0.0610 | 0.0615 | 0.0600 | 0.0557 | 0.0462 | 0.0469 | 0.7093  |
|                                          | Pantothenic acid (mg) | 0.0191                                         | 0.0191 | 0.0195 | 0.0183 | 0.0169 | 0.0129 | 0.0116 | 0.0179                                            | 0.0177 | 0.0181 | 0.0176 | 0.0169 | 0.0138 | 0.0125 | 0.1686  |
|                                          | Vitamin B6 (mg)       | 0.0047                                         | 0.0047 | 0.0047 | 0.0044 | 0.0044 | 0.0033 | 0.0034 | 0.0046                                            | 0.0045 | 0.0046 | 0.0044 | 0.0041 | 0.0035 | 0.0035 | 0.0342  |
|                                          | Folate (µg)           | 0.9                                            | 0.9    | 0.9    | 0.8    | 0.8    | 0.6    | 0.6    | 0.9                                               | 0.9    | 0.9    | 0.8    | 0.9    | 0.6    | 0.6    | 7.1     |
|                                          | Vitamin B12 (µg)      | 0.057                                          | 0.057  | 0.058  | 0.053  | 0.046  | 0.036  | 0.036  | 0.061                                             | 0.059  | 0.060  | 0.054  | 0.051  | 0.036  | 0.038  | 0.339   |
|                                          | Vitamin C (mg)        | 0.11                                           | 0.11   | 0.11   | 0.11   | 0.10   | 0.08   | 0.08   | 0.11                                              | 0.11   | 0.11   | 0.11   | 0.10   | 0.08   | 0.08   | 0.70    |
|                                          | Vitamin A (µg)        | 5.3                                            | 5.1    | 5.0    | 4.7    | 4.8    | 2.8    | 3.1    | 5.4                                               | 4.9    | 5.0    | 4.7    | 4.6    | 3.0    | 3.2    | 23.7    |
|                                          | Vitamin D (IU)        | 0.3                                            | 0.3    | 0.3    | 0.3    | 0.3    | 0.2    | 0.2    | 0.3                                               | 0.3    | 0.3    | 0.3    | 0.3    | 0.2    | 0.2    | 1.4     |
|                                          | Vitamin E (mg)        | 0.043                                          | 0.043  | 0.042  | 0.034  | 0.032  | 0.028  | 0.031  | 0.042                                             | 0.041  | 0.041  | 0.033  | 0.032  | 0.030  | 0.031  | 0.286   |
| Minerals                                 | Calcium (mg)          | 5.6                                            | 5.6    | 5.5    | 4.8    | 4.5    | 3.6    | 3.6    | 5.4                                               | 5.3    | 5.5    | 4.7    | 4.6    | 3.6    | 3.6    | 23.6    |
|                                          | Copper (mg)           | 0.0068                                         | 0.0074 | 0.0077 | 0.0071 | 0.0078 | 0.0041 | 0.0043 | 0.0074                                            | 0.0074 | 0.0076 | 0.0071 | 0.0070 | 0.0048 | 0.0045 | 0.0528  |
|                                          | Iron (mg)             | 0.045                                          | 0.045  | 0.045  | 0.043  | 0.040  | 0.030  | 0.032  | 0.042                                             | 0.042  | 0.042  | 0.041  | 0.040  | 0.030  | 0.031  | 0.541   |
|                                          | Magnesium (mg)        | 0.6                                            | 0.7    | 0.7    | 0.7    | 0.6    | 0.5    | 0.5    | 0.6                                               | 0.6    | 0.6    | 0.6    | 0.6    | 0.5    | 0.5    | 9.1     |
|                                          | Manganese (mg)        | 0.0093                                         | 0.0091 | 0.0097 | 0.0086 | 0.0086 | 0.0072 | 0.0071 | 0.0093                                            | 0.0093 | 0.0096 | 0.0094 | 0.0082 | 0.0080 | 0.0085 | 0.1171  |
|                                          | Phosphorus (mg)       | 3.6                                            | 3.6    | 3.7    | 3.3    | 3.2    | 2.5    | 2.5    | 3.5                                               | 3.4    | 3.5    | 3.2    | 3.4    | 2.5    | 2.9    | 48.9    |
|                                          | Potassium (mg)        | 8.6                                            | 8.6    | 8.8    | 8.5    | 8.2    | 6.6    | 6.4    | 8.2                                               | 8.2    | 8.4    | 8.2    | 8.1    | 6.2    | 6.2    | 78.1    |
|                                          | Zinc (mg)             | 0.053                                          | 0.053  | 0.053  | 0.048  | 0.045  | 0.041  | 0.044  | 0.051                                             | 0.051  | 0.051  | 0.047  | 0.045  | 0.042  | 0.042  | 0.587   |

Columns under "Separate Prediction of Nutrient and Energy Intake" present mean absolute error of nutrient intake densities estimated by separately predicting nutrient intake and energy intake, dividing predicted nutrient intake by predicted energy intake, and comparing the results to observed dietary intake measurements in the FCS-24. Columns under "Direct Prediction of Nutrient Intake Densities" are reproduced from Table 3.8 for comparison. See Table 4 for detailed descriptions of models 1-5. Brief description of variable categories considered for selection in each model: (1) Household and individual demographic, socioeconomic, and lifestyle characteristics, (2) Model 1 variables + quantitative total household consumption of food groups and nutrients, (3) Model 2 variables + individuals' self-evaluation of nutrition knowledge and its application to their lives, (4a) Model 3 variables + cursory qualitative 24-hour recall and assessment of eating behaviors, (4b) Model 3 variables + cursory semiquantitative 24-hour recall and assessment of eating behaviors, (4c) Model 3 variables + detailed semiquantitative 24-hour recall, (5) Model 4 variables + measured anthropometry. Mean dietary intake density from the FCS-24 is provided in the "Density" column for better interpretability of

116 all mean absolute error estimates. Blue-Yellow-Red shading indicates the magnitude of mean absolute error in predicting dietary nutrient intake  
117 density proportional to mean observed dietary intake density (per 100 kcal) (Blue: minimum absolute error; Yellow: median; Red: maximum).  
118 Abbreviations: FCS-24 (nested 24-hour recall of the 2013 Food Consumption Survey), IU (international unit; 40 IU = 1 µg).
