# Supplementary material for: Comparison of Methods for Estimating Dietary Food and Nutrient Intakes and Intake Densities from Household Consumption and Expenditure Data in Mongolia
Source: MDPI journal article supplement (doi:10.3390/nu10060703), 2018-05-31
Supplement: s1 [file s1]

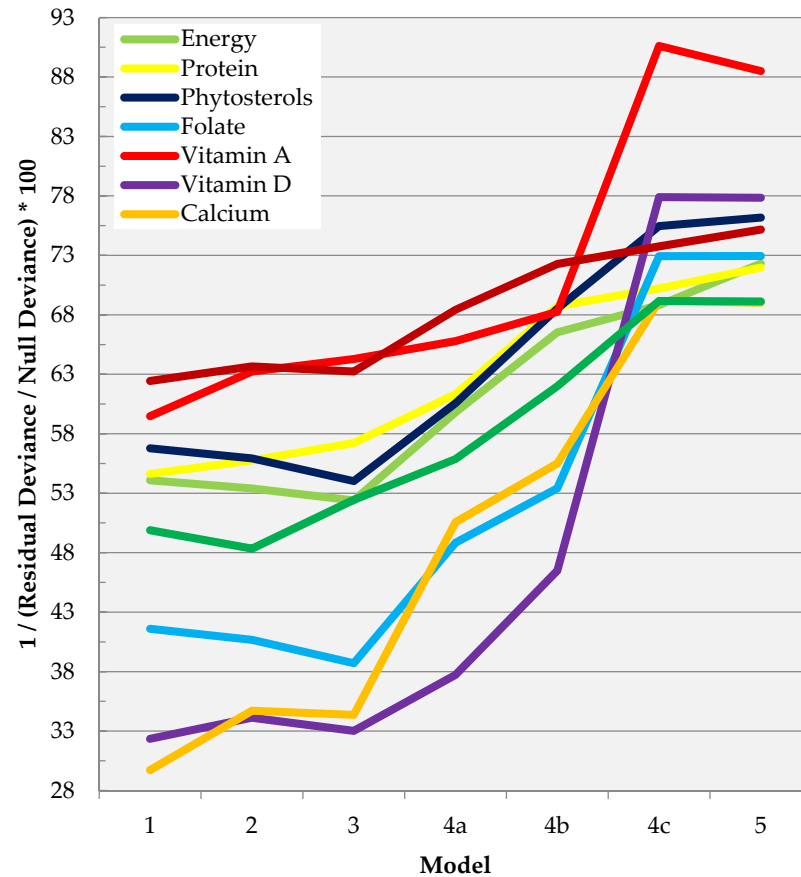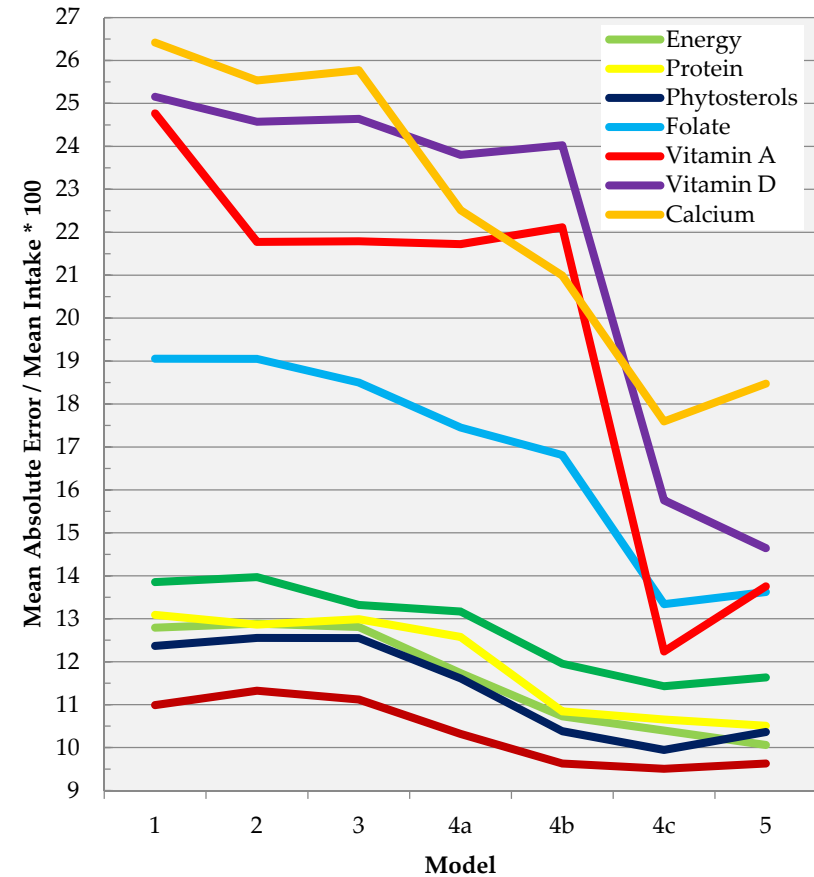

**Figure 4.** In-sample fit statistics for increasingly complex predictive models of individuals' dietary intakes of selected nutrients in the FCS-24 (Aim 4). See Table 3.4 for detailed descriptions of models 1-5. Brief description of variable categories considered for selection in each model: (1) Household and individual demographic, socioeconomic, and lifestyle characteristics, (2) Model 1 variables + quantitative total household consumption of food groups and nutrients, (3) Model 2 variables + individuals' self-evaluation of nutrition knowledge and its application to their lives, (4a) Model 3 variables + cursory qualitative 24-hour recall and assessment of eating behaviors, (4b) Model 3 variables + cursory semiquantitative 24-hour recall and assessment of eating behaviors, (4c) Model 3 variables + detailed semiquantitative 24-hour recall, (5) Model 4 variables + measured anthropometry. Abbreviation: FCS-24 (nested 24-hour recall of the 2013 Food Consumption Survey).<sup>5</sup>
